# 1           **CROP: A Retromer-PROPPIN complex mediating** 2           **membrane fission in the endo-lysosomal system**

3  
4  
5 Thibault Courtellemont, Maria Giovanna De Leo, Navin Gopaldass, Andreas Mayer\*  
6 Department of Biochemistry, University of Lausanne, Epalinges, Switzerland

7 \*Author for correspondence: [andreas.mayer@unil.ch](mailto:andreas.mayer@unil.ch).

## 8 9 **Abstract**

10  
11           Endo-lysosomal compartments exchange proteins by fusing, fissioning, and  
12 through endosomal transport carriers. Thereby, they sort many plasma membrane  
13 receptors and transporters and control cellular signaling and metabolism. How the  
14 membrane fission events are catalyzed is poorly understood. Here, we identify the  
15 novel CROP complex as a factor acting at this step. CROP joins members of two  
16 protein families: the peripheral subunits of retromer, a coat forming endosomal  
17 transport carriers, and membrane inserting PROPPINs. Integration into CROP  
18 potentiates the membrane fission activity of the PROPPIN Atg18 on synthetic  
19 liposomes and confers strong preference for binding PI(3,5)P<sub>2</sub>, a phosphoinositide  
20 required for membrane fission activity. Disrupting CROP blocks fragmentation of  
21 lysosome-like yeast vacuoles *in vivo*. CROP-deficient mammalian endosomes  
22 accumulate micrometer-long tubules and fail to export cargo, suggesting that carriers  
23 attempt to form but cannot separate from these organelles. PROPPINs compete for  
24 retromer binding with the SNX proteins, which recruit retromer to the membrane  
25 during the formation of endosomal carriers. Transition from retromer-SNX complexes  
26 to retromer-PROPPIN complexes might hence switch retromer activities from cargo  
27 capture to membrane fission.

## 29 Introduction

30  
31 Endo-lysosomal compartments play a major role in controlling the abundance of most  
32 plasma membrane transporters and receptors and therefore have a key role in  
33 defining the communication, interaction, and transport capacities of a cell. They  
34 receive proteins from the cell surface or from the Golgi and sort them either for  
35 recycling back to these compartments, or for transfer to lysosomes, where many of  
36 them become degraded (Cullen & Steinberg, 2018; Ma & Burd, 2019; Seaman,  
37 2019). Endo-lysosomal compartments exchange proteins and lipids through homo-  
38 and heterotypic fusion and fission events and through tubular-vesicular carriers.  
39 These structures can be formed by a variety of membrane coats, which can recruit  
40 cargo into them, such as retromer, retriever, CCC or ESCPE (Cullen & Steinberg,  
41 2018).

42  
43 Retromer is a conserved coat that consists of a peripheral part and of a lipid-  
44 interacting part. In yeast, retromer has been discovered as a stable entity that could  
45 be dissociated into two subcomplexes, consisting of the sorting nexins Vps5 and  
46 Vps17 (SNX complex) and of a complex of Vps26, Vps29 and Vps35 (CSC complex)  
47 (Seaman *et al*, 1998). SNX binds membranes via PX domains, which recognize  
48 phosphatidylinositol-3-phosphate (PI3P) (Burda *et al*, 2002), and via BAR domains,  
49 which preferentially associate with highly curved bilayers. The Vps26/29/35 complex  
50 by itself shows only weak affinity for the membrane and requires SNX for recruitment.  
51 Retromer associates with cargo and numerous other factors, which are important for  
52 the formation of the transport carriers and/or their fission from the membrane. These  
53 include components of the Rab-GTPase system (Seaman *et al*, 2009; Rojas *et al*,  
54 2008; Da Jia *et al*, 2016; Balderhaar *et al*, 2010; Liu *et al*, 2012; Purushothaman &  
55 Ungermann, 2018), the actin-regulating WASH complex (Jia *et al*, 2012; Harbour *et*  
56 *al*, 2012; Chen *et al*, 2019; Derivery *et al*, 2009; Gomez & Billadeau, 2009; Phillips-  
57 Krawczak *et al*, 2015; Rojas *et al*, 2007; Temkin *et al*, 2011; Lucas *et al*, 2016), or  
58 EHD1, and ATPase with structural similarities to dynamins (Daumke *et al*, 2007;  
59 Gokool *et al*, 2007).

60  
61 Structural analyses of retromer shed light onto its mode of action (Hierro *et al*, 2007;  
62 Lucas *et al*, 2016; Kovtun *et al*, 2018; Kendall *et al*, 2020; Collins *et al*, 2008; 2005;

63 Purushothaman *et al*, 2017). These studies begin to elucidate cargo recognition, the  
64 organization of the subunits on the membrane and the way in which their association  
65 promotes membrane tubulation. The subsequent step of detaching the carrier from  
66 the donor membrane is promoted by numerous protein factors, but their mechanism  
67 of action in the context of retromer is still poorly understood: the actin-regulating  
68 WASH complex could enhance fission by increasing membrane tension and friction  
69 (Bar-Ziv *et al*, 1999; Markin *et al*, 1999; Derivery *et al*, 2009; Gomez & Billadeau,  
70 2009; Phillips-Krawczak *et al*, 2015; Simunovic *et al*, 2017). Mechanochemical  
71 factors, such as the dynamin-like GTPase Vps1 or ATPases of the EHD family, might  
72 constrict the membranes (Chi *et al*, 2014; Deo *et al*, 2018). Fission appears to be  
73 favored also by contact of the endosomal transport carriers to ER membranes  
74 (Rowland *et al*, 2014). Recently, we described fission activity of the PROPPIN Atg18  
75 on synthetic liposomes (Gopaldass *et al*, 2017) and showed that its human homolog  
76 WIPI1 is required for protein exit from endosomes (De Leo *et al*, 2021).

77  
78 PROPPINs form a protein family that is present with multiple isoforms in eukaryotic  
79 cells from yeast to men (Dove *et al*, 2004). Baker's yeast expresses three isoforms,  
80 Atg18, Atg21 and Hsv2, and mammalian cells express four genes (WIPI1 through 4).  
81 PROPPINs bind phosphoinositides phosphorylated on the 3- and/or 5-position and  
82 support the assembly of the autophagic machinery on phagophores (Vicinanza *et al*,  
83 2015; Baskaran *et al*, 2012; Krick *et al*, 2012; Liang *et al*, 2019; Proikas-Cezanne *et al*,  
84 2004; Watanabe *et al*, 2012). In autophagy, WIPI proteins interact with and recruit  
85 key factors of this machinery, such as Atg16L1, Atg5, Atg12 and Atg2. They also  
86 participate in autophagic signaling and promote the interaction of the isolation  
87 membrane with the ER (Stromhaug *et al*, 2004; Obara *et al*, 2008; Polson *et al*, 2010;  
88 Dooley *et al*, 2014; Proikas-Cezanne *et al*, 2015; Bakula *et al*, 2017; Itakura &  
89 Mizushima, 2010; Lu *et al*, 2011) (Chowdhury *et al*, 2018; Stanga *et al*, 2019; Otomo  
90 *et al*, 2018; Lei *et al*, 2020). The autophagic functions of PROPPINs depend on  
91 phosphatidylinositol-3-phosphate (PI3P) or phosphatidylinositol-5-phosphate (PI5P)  
92 (Vicinanza *et al*, 2015; Baskaran *et al*, 2012; Krick *et al*, 2012; Liang *et al*, 2019;  
93 Proikas-Cezanne *et al*, 2004; Watanabe *et al*, 2012).

94  
95 PROPPINs are, however, not restricted to the sites of autophagosome formation.  
96 They show strong enrichment on endo-lysosomal organelles, where they reduce the

97 size of endosomes and influence the distribution of protein between the endosomes  
98 and the Golgi or vacuoles (Jeffries *et al*, 2004; Dove *et al*, 2004). The yeast  
99 PROPPIN Atg18 promotes the division of the vacuole into smaller fragments (Dove  
100 *et al*, 2004; Efe *et al*, 2007; Gopaldass *et al*, 2017; Zieger & Mayer, 2012; Michailat  
101 *et al*, 2012). The human PROPPIN WIPI1 is required in multiple protein exit  
102 pathways from endosomes, which transfer proteins to the plasma membrane, to the  
103 Golgi, or to lysosomes. Here, it promotes the PI3P-dependent formation of  
104 endosomal transport carriers and their phosphatidylinositol-3,5-bisphosphate  
105 (PI(3,5)P<sub>2</sub>) dependent fission from endosomes (De Leo *et al*, 2021). The endosomal  
106 and autophagic functions of Atg18 and WIPI1 can be differentiated through several  
107 molecular features and interactors, which are relevant only for one of the two  
108 processes (Gopaldass *et al*, 2017; De Leo *et al*, 2021).

109  
110 When incubated with synthetic giant unilamellar vesicles (GUVs) at micromolar  
111 concentrations, pure recombinant Atg18 suffices to tubulate these membranes and  
112 divide them into small vesicles, underlining its potential as a membrane fission  
113 protein (Gopaldass *et al*, 2017). These in vitro assays revealed that fission depends  
114 on a hydrophobic loop of Atg18, which can fold into an amphipathic helix when  
115 brought in contact with the membrane. The amphipathic helix is conserved in other  
116 PROPPINs and it is essential for membrane fission on mammalian endosomes as  
117 well as on yeast vacuoles in vivo (Gopaldass *et al*, 2017; De Leo *et al*, 2021). It was  
118 proposed that loop insertion promotes fission by increasing membrane curvature.  
119 This effect may be amplified by oligomerisation of Atg18, which could not be induced  
120 through PI3P, but only through PI(3,5)P<sub>2</sub> (Gopaldass *et al*, 2017; Scacioc *et al*,  
121 2017). PROPPINs are thus likely to be the effector proteins of PI(3,5)P<sub>2</sub>, the lipid that  
122 is necessary to drive fission on a variety of endo-lysosomal compartments  
123 (McCartney *et al*, 2014). Although there appears to be specificity for PI(3,5)P<sub>2</sub> in  
124 these functional terms, purified PROPPINs bind PI3P, PI5P and PI(3,5)P<sub>2</sub> fairly  
125 promiscuously (Vicinanza *et al*, 2015; Baskaran *et al*, 2012; Krick *et al*, 2012; Liang  
126 *et al*, 2019; Proikas-Cezanne *et al*, 2004; Watanabe *et al*, 2012; Busse *et al*, 2015).

127  
128 While these in vitro experiments clearly demonstrated the potential of PROPPINs to  
129 promote membrane fission, they could not resolve whether perform this function  
130 alone in the cellular context. Using the yeast PROPPIN Atg18 we hence began to



131 search for interactors that might participate in the Atg18-dependent fission of yeast  
132 vacuoles. This led us to discover a novel complex, which we term CROP. CROP  
133 integrates Atg18 with a part of the endosome- and vacuole-associated retromer  
134 complex to generate a membrane fission device of much higher potency. We studied  
135 its activity in yeast, in human cells and on liposomes.

136

## 137 **Results**

138

### 139 **Atg18 forms a complex with Vps26/29/35**

140

141 Seeking proteins that might cooperate with the PROPPIN Atg18 in driving membrane  
142 fission on yeast vacuoles, we affinity-purified a FLAG-tagged Atg18 (Atg18<sup>Gly6-FLAG3</sup>)  
143 expressed under its native promoter in yeast. Associated proteins were quantified by  
144 mass spectrometry, using SILAC (stable isotope labelling by amino acids in cell  
145 culture) (Fig. 1a). 11 proteins were significantly interacting with Atg18 (Suppl. Table  
146 1a). The most abundant interactor in normal rich medium was Atg2, a protein binding  
147 Atg18 during autophagosome formation (Obara *et al*, 2008). Other Atg18 interactors,  
148 such as the phosphatase Sit4, which is required for vacuole fission (Michaillat *et al*,  
149 2012; Michaillat & Mayer, 2013), and its regulatory subunits Cdc55 and Sap155,  
150 were detected in extracts from cells in which vacuole fission had been triggered by a  
151 moderate osmotic shock (Zieger & Mayer, 2012) (Fig. 1b). Also three proteins from  
152 the retromer complex (Vps26, Vps35, and Vps29) bound Atg18 more strongly upon  
153 triggering vacuole fission. They form a stable subcomplex, called cargo-selective  
154 complex (CSC) (Seaman *et al*, 1998). Our mass spectrometry analysis had not  
155 identified any peptides from Vps5 or Vps17, the phosphatidylinositol-3-phosphate  
156 (PI3P)-interacting sorting nexins (SNX complex) that recruit CSC to the membrane  
157 (Seaman *et al*, 1998).

158 We tested the CSC-Atg18 interaction through immunoadsorption. To this end,  
159 we tagged all retromer subunits individually with yomCherry and expressed them at  
160 their genomic locus, together with Atg18<sup>HA3-yeGFP</sup>. Upon detergent lysis of whole cells  
161 and immunoadsorption on anti-mCherry beads, the three CSC subunits, but not the  
162 SNX-complex subunits, co-adsorbed Atg18<sup>HA3-yeGFP</sup> (Fig. 1c). In cells lacking Vps26  
163 (*vps26Δ*), the interaction between Atg18<sup>HA3yeGFP</sup> and Vps35<sup>yomCherry</sup> was decreased,  
164 yet it remained above the background defined by the non-tagged control (Fig. 1e).

165 Thus, Vps26 contributes significantly but not exclusively to this interaction. In live cell  
166 confocal fluorescence imaging, Vps26<sup>yomCherry</sup> and Atg18<sup>yeGFP</sup> formed multiple puncta,  
167 which partially overlapped at the vacuolar membrane (Fig. 1d, white arrows).  
168 Triggering fragmentation of the vacuole through a moderate hypertonic shock  
169 increased the colocalization between Vps26 and Atg18, particularly at sites of  
170 vacuole-vacuole contact (Fig 1d). Both *in-vivo* and *in-vitro* observations thus suggest  
171 a novel complex between CSC and Atg18, which we term the CROP complex.

172

### 173 **Atg18 and sorting nexins compete for binding to Vps26/29/35**

174

175 We tested the functional relevance of retromer for fission of vacuoles by  
176 labeling these organelles with the fluorophore FM4-64 *in vivo*. In agreement with  
177 previous observations (Raymond *et al*, 1992; Liu *et al*, 2012; Balderhaar *et al*, 2010),  
178 strains lacking the SNX subunits (*vps5Δ* and *vps17Δ*) presented many small vacuolar  
179 fragments whereas the CSC mutants *vps26Δ*, *vps29Δ* and *vps35Δ* showed fewer and  
180 larger vacuoles than the wild type (Fig. 2a). After addition of 0.5 M salt to stimulate  
181 vacuole fission (Bonangelino *et al*, 2002; Zieger & Mayer, 2012), all three CSC  
182 mutants maintained their large central vacuoles, whereas wildtype cells fragmented  
183 the compartment into multiple (>7) vesicles that were much smaller and numerous  
184 than before (Fig. 2b,c). This led us to the hypothesis that the CSC subunits promote  
185 vacuole fission whereas the SNX subunits may prevent hyper-activity of the fission  
186 machinery. They might do so by interfering with the formation of the CROP complex.  
187 In line with this, the co-immunoadsorption of Atg18<sup>HA3-eGFP</sup> with Vps26<sup>yomCherry</sup> was  
188 strongly increased in the SNX mutant *vps17Δ* (Fig. 3a). Furthermore, the vacuolar  
189 hyper-fragmentation of the *vps17Δ* cells could be fully reverted by deleting ATG18  
190 and its redundant homolog ATG21, or by deleting VPS26 (Fig. 3 b,c). Thus, both  
191 CSC and Atg18 are required for vacuole fission.

192

193 To assay formation of CROP directly, we purified Atg18 from bacteria and  
194 CSC from yeast, where the Vps29 was labeled with GFP. We noted that the addition  
195 of Atg18 to CSC-GFP induced a strong shift in the fluorescence signal of the GFP.  
196 Ligand binding can change the properties of protein-bound fluorophores via changes  
197 in orientation, contacts, or rotational freedom of the fluorophore. Such changes are a

198 common tool used in titration experiments to determine binding constants.  
199 Fluorescence intensity increased with recombinant Atg18 concentration, allowing us  
200 to estimate a  $K_d$  value close to 50 nM (Fig. 4b). We also evaluated the formation of  
201 CROP by blue native polyacrylamide gel electrophoresis and Western blotting. Here,  
202 Atg18 migrates mostly as expected for a monomer, but also shows a weaker band  
203 consistent with a dimer. Purified CSC forms two major bands, in line with previous  
204 observations of monomers and dimers (Kendall *et al*, 2020). Mixing CSC with an  
205 equimolar amount of Atg18 transformed CSC into more slowly migrating species,  
206 which both contained Atg18 and hence represent CROP (Fig. 4a). These bands were  
207 abolished, when purified SNX (Vps5/Vps17) was incorporated to the mix of proteins  
208 at a five-fold excess over Atg18 and CSC. This suggests that SNX interferes with  
209 CROP formation or stability, which is also consistent with our observation that CROP  
210 is more abundant in Atg18 pull-downs from *vps17* $\Delta$  strains (Fig. 3a).

211  
212

### 213 **The Atg18-CSC interaction is necessary for membrane fission**

214

215 Our immuno-adsorptions occasionally yielded a slightly shorter, C-terminal proteolytic  
216 fragment of Atg18<sup>HA3-yEGFP</sup>. This truncated form had lost the capacity of full-length  
217 Atg18 to interact with CSC, suggesting that the binding site could be located in the  
218 removed N-terminal region, in blade 1 or 2 of the Atg18  $\beta$ -propeller. This region has  
219 also been implicated in binding Atg2, which is required for the function of Atg18 in  
220 autophagy (Watanabe *et al*, 2012; Rieter *et al*, 2013). Alignment of various Atg18 and  
221 WIP11/2 orthologs revealed a stretch of conserved residues in blade 2 (Fig. 5a),  
222 which is located at the opposite side of the two phosphoinositide binding sites that  
223 anchor these proteins to the membrane (Fig. 5b). The motif contains three serines  
224 and threonines. At least two of these, Thr<sup>56</sup> and Ser<sup>57</sup>, can be phosphorylated in vivo  
225 (Feng *et al*, 2015). We generated Atg18<sup>HA3-yEGFP</sup> with alanine and glutamate  
226 substitutions of these residues and tested their consequences on vacuolar  
227 morphology and on the Atg18-Vps26 interaction (Fig. 5c). Except for S57E, which  
228 was hardly expressed, all other variants were expressed comparably as the wildtype,  
229 and they bound to vacuoles (Fig. 5d). A strong effect was observed for the T56E  
230 substitution. It largely abolished the co-immunoadsorption of Atg18<sup>HA3-yEGFP</sup> and  
231 Vps26<sup>YomCherry</sup>, suggesting that it compromised the interaction of Atg18 with CSC. In

232 vivo microscopy supported this: In contrast to Atg18<sup>HA3-yEGFP</sup>, which concentrates in  
233 numerous foci on the vacuole membrane, often at sites enriched in Vps26<sup>yomCherry</sup>,  
234 Atg18<sup>T56E-HA3-yEGFP</sup> showed a homogenous distribution along the vacuole and no co-  
235 enrichment with Vps26<sup>yomCherry</sup> (Fig. 5d). Thus, CSC is required to concentrate Atg18  
236 in vivo.

237

238 The T56E substitution also impaired vacuole fission in vivo. Upon a salt shock, which  
239 stimulates rapid vacuole fission in *ATG18<sup>WT</sup>* cells, *atg18<sup>T56E</sup>* cells maintained few  
240 large vacuoles (Fig. 6 a,b). The hyper-fragmentation of vacuoles in *vps17Δ* cells,  
241 which depends on Atg18 (Fig. 3), provided an additional means of testing the effect  
242 of the T56E substitution. We used the *vps17Δ atg18Δ atg21Δ* cells, in which the  
243 hyper-fragmented phenotype of *vps17Δ* is suppressed by the lack of functional  
244 CROP. This allows the strain to recover 1-2 large vacuoles (see Fig. 3). Whereas re-  
245 expression of *ATG18<sup>WT</sup>* in this strain rescued vacuole fission and re-established  
246 hyper-fragmented vacuoles (Fig. 6 c,d), *atg18<sup>T56E</sup>* could not provide this activity and  
247 behaved similarly as the fission-defective *atg18<sup>FGGG</sup>*, a variant in which both  
248 phosphoinositide binding sites are compromised (Efe *et al*, 2007; Dove *et al*, 2004;  
249 Gopaldass *et al*, 2017; Baskaran *et al*, 2012; Krick *et al*, 2012) (Watanabe *et al*,  
250 2012). These observations support the notion that the interaction of Atg18 with CSC  
251 in the CROP complex is necessary for vacuole fission.

252

253

### 254 **CROP drives membrane fission on giant unilamellar liposomes**

255

256 To directly test how CROP interacts with and acts on pure lipid membranes we  
257 created *in vitro* models with synthetic vesicles. Small unilamellar vesicles (SUVs)  
258 containing 5% each of PI3P and PI(3,5)P<sub>2</sub> could recruit purified CROP components  
259 in a liposome centrifugation assay (Fig. 7a). Atg18<sup>T56E</sup> and Atg18<sup>WT</sup> fractionated with  
260 the liposomes whereas Atg18<sup>FGGG</sup> bound very poorly. CSC by itself also interacted  
261 poorly with the vesicles. It was efficiently recruited to them through Atg18<sup>WT</sup>, but  
262 much less through Atg18<sup>T56E</sup> and Atg18<sup>FGGG</sup> (Fig. 7b). This provides evidence for the  
263 interaction of the pure CROP components on the membrane.

264

265 Next, we generated giant unilamellar vesicles (GUVs) from lipid mixtures containing  
266 0.5% of the fluorescent lipid phosphatidylethanolamine-CY5.5. These vesicles are  
267 large enough for light-microscopic analyses (Fig. 7c). Size-fractionated GUVs were  
268 incubated with Atg18 that had been covalently coupled to a dylight<sup>550</sup> fluorophore.  
269 Pure Atg18 rapidly bound the GUVs, but only when they contained PI3P or PI(3,5)P<sub>2</sub>,  
270 consistent with earlier studies showing that both lipids efficiently recruit PROPPINs to  
271 synthetic membranes (Baskaran *et al*, 2012; Krick *et al*, 2012; Scacioc *et al*, 2017;  
272 Gopaldass *et al*, 2017). Remarkably, Atg18 discriminated the two lipids when it was  
273 incubated in the presence of an excess of CSC, which incorporates Atg18 into  
274 CROP. Under these conditions, Atg18 bound only to the PI(3,5)P<sub>2</sub>-containing GUVs  
275 but not to PI3P-GUVs. This suggests that integration into CROP tunes the lipid  
276 affinity of Atg18 towards PI(3,5)P<sub>2</sub>, the phosphoinositide necessary to trigger vacuole  
277 fission in vivo.

278  
279 Finally, we assessed the impact of CROP on GUV structure upon longer incubations.  
280 Atg18-dylight<sup>550</sup> was bound to GUVs containing both 2.5% PI3P and 2.5% PI(3,5)P<sub>2</sub>.  
281 Thereby we sought to mimic the fact that the normally minor level of PI(3,5)P<sub>2</sub>  
282 increases substantially when vacuole fission is induced by hypertonic shift. It can  
283 then become of similar abundance as PI3P (Bonangelino *et al*, 2002; Cooke *et al*,  
284 1998). During the 30 min incubation, Atg18<sup>WT</sup> and Atg18<sup>T56E</sup> were recruited to the  
285 surface of the GUVs, whereas most Atg18<sup>FGGG</sup> remained in the buffer (Fig. 8).  
286 Atg18<sup>WT</sup> and Atg18<sup>T56E</sup> distributed along the membrane in a homogeneous manner.  
287 Upon addition of 50 nM CSC-GFP, followed by a second incubation phase of 30 min,  
288 CSC bound to GUVs, when Atg18<sup>WT</sup> was present. Binding coincided with the  
289 formation of a large number of small vesicles that remained attached to the GUVs.  
290 The generated vesicles showed strong signals of Atg18-dylight<sup>550</sup> and CSC<sup>GFP</sup>, with  
291 CSC<sup>GFP</sup> being concentrated in numerous puncta on or between these vesicles.  
292 Atg18<sup>T56E</sup> recruited less CSC-GFP to the GUVs than Atg18<sup>WT</sup>, and it formed only very  
293 few smaller vesicles and CSC<sup>GFP</sup> puncta. At the concentration used (25 nM), Atg18  
294 alone did not induce any fission or tubulation on GUVs. Pure Atg18 can promote  
295 fission of GUVS only at >50 times higher concentration, as we have shown  
296 previously (Gopaldass *et al*, 2017). This suggests that the integration of Atg18 into  
297 CROP potentiates its membrane fission activity.

298

299

## 300 **CROP is required for protein exit from mammalian endosomes**

301

302 Both CSC and PROPPINs are conserved from yeast to mammals (in mammals, CSC  
303 alone is called retromer), suggesting that also CROP might be conserved. Sequence  
304 alignment and modeling allowed us to identify the equivalent residue of Atg18 T56 in  
305 its human homolog WIPI1 as the S69 residue (Fig. 5a). Since the endosomal system  
306 of mammalian cells is more developed than that of yeast (Day *et al*, 2018), it offers  
307 better possibilities to study the formation of endosomal transport carriers. This is  
308 illustrated by manipulations of WIPI1, which can suppress the fission of such carriers  
309 and lead to the accumulation of micrometer-long tubules on the endosomes of HK2  
310 cells (De Leo *et al*, 2021). These tubules are very prominent and easy to recognize.  
311 We deleted WIPI1 from this human cell line and used plasmid transfection to re-  
312 express fluorescent WIPI1 fusions with S69A or S69E substitutions (Fig. 9a-c). Both  
313 variants were expressed to similar levels as the wildtype (Fig. 9c). While human  
314 Vps26<sup>eGFP</sup> colocalized extensively with WIPI1<sup>WT-mCherry</sup> in dots, which represent  
315 endosomes (De Leo *et al*, 2021), both WIPI1<sup>S69</sup> substitutions partially segregated the  
316 two proteins, which is consistent with an impairment of their interaction. Similar  
317 observations were made using hVps35<sup>eGFP</sup> instead of hVps26<sup>eGFP</sup> (Supp. Fig 1a, b).  
318 In cells expressing WIPI1<sup>S69A-eGFP</sup>, and more so for those expressing WIPI1<sup>S69E-eGFP</sup>,  
319 micrometer-long membrane tubules emanated from endosomes. Their abundance  
320 and size were further increased by simultaneous knockdown of hVps35 (Fig. 9 d, e).  
321 Similar elongated tubules are observed when the fission activity of WIPI1 is  
322 abrogated by mutations in its lipid binding domains, or in its amphipathic helix in CD  
323 loop 6, which is essential for its fission activity (De Leo *et al*, 2021). Substitutions  
324 inactivating fission activity of WIPI1 (De Leo *et al*, 2021) also have effects on  
325 compartments carrying the lysosomal marker Lamp1. These were also recapitulated  
326 by WIPI1<sup>S69E-eGFP</sup>. Whereas lysosomes normally form small puncta that are dispersed  
327 in the cytosol and partially colocalize with eGFP-WIPI1<sup>WT</sup>, Lamp1-positive  
328 compartments are grossly enlarged in cells expressing WIPI1<sup>S69E-eGFP</sup> (Supp. Fig 2b).  
329 eGFP-eWIPI1<sup>S69A</sup> produced a qualitatively similar but weaker phenotype.

330

331 We assayed the effects of the S69 substitutions on protein exit from the endosomes  
332 via trafficking of transferrin receptor (TfR), a protein that shuttles transferrin from the



333 plasma membrane towards endosomes and back (Dautry-Varsat *et al*, 1983). The  
334 endosomes of HK2 cells were loaded with transferrin and then subjected to a chase  
335 in transferrin-free medium (Fig. 10 a,b). WIPI1 knockout cells re-expressing WIPI1<sup>WT-</sup>  
336 <sup>eGFP</sup> efficiently returned transferrin back to the cell surface, from where it finally  
337 dissociates, leaving very little transferrin associated with the cells after the chase  
338 period. By contrast, cells expressing WIPI1<sup>S69E-eGFP</sup> retained transferrin in their  
339 endosomes. WIPI1<sup>S69E-eGFP</sup> was even dominant negative over the endogenous  
340 WIPI1, since it had a similarly strong effect on Tf recycling in wildtype cells (Supp.  
341 Fig. 2a) as in WIPI1 knockout cells (Fig. 10). That WIPI1<sup>S69E-eGFP</sup> provokes the  
342 accumulation of exaggerated tubules and interferes with cargo exit from endosomes  
343 is consistent with the notion that CROP promotes fission of endosomal transport  
344 carriers at mammalian endosomes.

345

## 346 Discussion

347

348 Our results suggest that the PROPPIN Atg18 associates with parts of retromer to  
349 form the CROP complex. While pure Atg18 alone displays fission activity on GUVs at  
350 micromolar concentrations (Gopaldass *et al*, 2017), CROP promotes fission of these  
351 synthetic vesicles in the low nanomolar range, i.e. with much higher potency. In line  
352 with this, destabilization of CROP produces a number of in vivo phenotypes that are  
353 consistent with a loss of fission activity: It interferes with vacuole fragmentation and  
354 with endosomal membrane exit; and it leads to the accumulation of huge endosomal  
355 tubules, which were proposed to represent endosomal carriers that continue to  
356 elongate but fail to detach (De Leo *et al*, 2021). This favors the notion that CROP  
357 represents the relevant agent for fission on endo-lysosomal membranes in vivo.  
358 CROP provides a novel function to retromer subunits that are associated with  
359 Parkinson's and Alzheimer's disease, such as hVps35 (Li *et al*, 2019; McMillan *et al*,  
360 2017; Rahman & Morrison, 2019). Therefore, it opens novel perspectives for the  
361 mechanistic analysis of these pathologies in relation to the fission activity of CROP.

362

363 The Vps26/29/35 complex (CSC) has a tendency to oligomerize (Hierro *et al*, 2007;  
364 Lucas *et al*, 2016; Kovtun *et al*, 2018; Kendall *et al*, 2020; Collins *et al*, 2008; 2005;  
365 Purushothaman *et al*, 2017). In the context of retromer, this oligomerisation supports  
366 the formation of tubular endosomal transport carriers, which sequester cargo exiting

367 from endo-lysosomal compartments. If such oligomerisation occurred also when  
368 Atg18 is bound, it would concentrate multiple copies of Atg18 on a small membrane  
369 patch. This might be relevant for fission, because the hydrophobic CD loop 6 of  
370 Atg18 forms a conserved amphipathic alpha-helix when brought into contact with a  
371 bilayer (Gopaldass *et al*, 2017). The shallow insertion of this helix into the membrane  
372 should increase the curvature of the bilayer (Boucrot *et al*, 2012; Campelo *et al*,  
373 2008). The concentration of several helices through oligomeric CSC is expected to  
374 enhance this effect, making fission more efficient.

375

376 Structural analyses of retromer and the associated SNX protein have yielded first  
377 models of how this coat might form tubular endosomal carriers (Hierro *et al*, 2007;  
378 Lucas *et al*, 2016; Kovtun *et al*, 2018; Kendall *et al*, 2020). The current models  
379 suggest a two-layered coat, in which an inner layer of SNX proteins recruits a  
380 peripheral layer of arch-shaped CSC complexes. Oligomerization of this coat is  
381 supported through multiple homo- and heteromeric interactions between CSC  
382 subunits, SNX subunits and cargo (Kovtun *et al*, 2018; Lucas *et al*, 2016) (van  
383 Weering *et al*, 2012). Our observations suggest that Atg18 and SNX compete for  
384 binding to CSC. If we assume that a retromer-coated tubule is a relatively  
385 homogeneous structure, in which all Vps35 and Vps26 subunits are engaged by  
386 SNXs, as proposed (Kovtun *et al*, 2018; Lucas *et al*, 2016), we can formulate a  
387 plausible working model for fission of ECVs. Since arch-like CSC structures carry  
388 Vps26 subunits at each of their "legs", CSC might remain bound to the tubular coat  
389 that it has assembled through one of its legs, while on the other leg a PROPPIN  
390 could bind instead of a sorting nexin. Since the PROPPIN and sorting nexins appear  
391 to compete for binding, such a recruitment might be favored at the rim of the tubular  
392 SNX layer, i.e., at the site where fission should occur to detach an endosomal carrier.  
393 The competition for CSC binding with the SNXs might thus help to target CROP  
394 activity to the correct place.

395

396 Fission activity of CROP is not only used to facilitate departure of endosomal cargo,  
397 but it can also drive the division of an entire organelle, as shown by the fragmentation  
398 of vacuoles. In yeast, both reactions require not only CROP but also the dynamin-like  
399 GTPase Vps1 (Chi *et al*, 2014; Peters *et al*, 2004; Zieger & Mayer, 2012; Arlt *et al*,  
400 2015). This is remarkable, because dynamin-like GTPases are mechanochemical

401 devices, which can squeeze membrane tubules to very small radii (Antonny *et al*,  
402 2016). We envision that the two protein systems cooperate to drive fission. This may  
403 create a situation similar to endocytosis, where the detachment of endocytic vesicles  
404 requires fission-promoting activity from dynamin and from additional membrane-  
405 deforming factors carrying fission activity, such as epsin (Boucrot *et al*, 2012).  
406 Dissecting the activities of CROP, retromer and dynamins will require refined in vitro  
407 systems that should allow to measure coat assembly, PROPPIN and dynamin  
408 recruitment, and membrane constriction.

409

410

## 411 **Materials and Methods**

412

### 413 **Yeast cell culture**

414 All strains were grown in either in YP (yeast extract, peptone) or in SC (synthetic  
415 dextrose) dropout media to select for auxotrophies and to avoid plasmids loss, both  
416 supplemented with 2% glucose. Conditions for SILAC growth are described below.  
417 Strains, plasmids and primers used in this study can be found in Table 2, 3 and 4.  
418 Liquid cultures were grown in at 30°C and shaken at 180 rpm.

419

### 420 **Strains and plasmids**

421 Genes were deleted by replacing a complete open reading frame with a natNT2  
422 (Euroscarf #P30346; Janke *et al*, 2004) or a loxP-flanked kanMX4 deletion cassette  
423 (Euroscarf #P30114; Güldener *et al*, 1996). Some constructs required to remove the  
424 kanMX4, using the Cre-lox P recombination method with plasmid pSH47 (Euroscarf  
425 #P30114; Güldener *et al*, 1996). Atg18 and CSC have been C-terminally tagged with  
426 either Gly<sub>6</sub>-FLAG<sub>3</sub>::kanMX4 (available on Addgene #20754; Funakoshi *et al* Yeast.  
427 2009), yomCherry::kanMX4, and yomCherry::SpHIS5 (both available on Addgene  
428 #44903 & #44841; Lee *et al.*, 2013) by direct insertion of these tags at their genomic  
429 locus. Atg18-GFP was expressed from pRS316-Atg18-HA<sub>3</sub>-GFP (Atg18-HG), which  
430 was a kind gift of Dr Y. Ohsumi (Tokyo Institute of Technology). GFP has been  
431 replaced for a yeast version yeGFP, subcloned from pKT0127 (Addgene #8728;  
432 Sheff *et al*, 2004) and placed in between the Sph1/Not1 restriction sites to generate  
433 pRS316-Atg18-HA<sub>3</sub>-yeGFP. Mutants in the putative retromer interaction motif  
434 (LFSTSL) of Atg18 were created by site-directed PCR mutagenesis (See Appendix

435 for primer details), except for the mutant S55E, which has been generated by  
436 replacing the region between restriction site MfeI and MscI through chemically  
437 synthesized double-stranded DNA (from Eurofins) containing the mutation. Strains  
438 used for SILAC must be auxotrophic for lysine and arginine. BJ3505 already contains  
439 the *lys2-208* auxotrophic and arginine auxotrophy was generated by deleting *ARG4*.  
440 Since BJ3505 cells lack activity of the arginine importer Can1, we restored uptake of  
441 exogenous arginine by expressing CAN1 from the NOP1 promoter. *CAN1* was  
442 subcloned from the BY4741 background into a *pRS406-promNOP1::CaURA3*  
443 *plasmid*. This plasmid has been linearized using the *StuI* restriction site of the  
444 *CaURA3* locus and transformed in BJ3505 *arg4Δ*, complementing the *ura3-52*  
445 mutation and creating the sTC22 strain suitable for SILAC. All constructs were  
446 verified by PCR and DNA sequencing; yeast transformations were performed using  
447 the LiAc/SS carrier DNA/PEG method (Gietz, R., Schiestl, R., *Nat Protoc* **2**, 31–34  
448 (2007))

449  
450 eGFP-WIPI1<sup>WT</sup> (pAR31CD vector) was kindly provided by Tassula Proikas-Cezanne  
451 (Tübingen, Germany); EGFP-Vps35 was a gift from Peter Cullen (Bristol, UK). To  
452 generate mCherry-WIPI1, mCherry and WIPI1 fragments were amplified from pFA6a-  
453 mCherry-V5-KanMX6 (from Fulvio Reggiori, University Medical Center Groningen,  
454 Netherlands) and eGFP-WIPI1 plasmid, respectively, by using the primers Age1-  
455 mCherry/eGFP-WIPI1-EcoRI (see Table 4). The two fragments were fused by  
456 overlap extension-PCR and cloned into pAR31CD between Age1 and EcoR1  
457 restriction sites.

458 eGFP-WIPI1<sup>WT</sup> was used as DNA template for site-directed mutagenesis  
459 (QuikChange mutagenesis system, Agilent Technologies) to generate point  
460 mutations in the FSSS motif. mCherry-WIPI1<sup>S69E</sup>, mCherry-WIPI1<sup>S69A</sup> were produced  
461 using mCherry-WIPI1<sup>WT</sup> as template and eGFP-WIPI1<sup>S69E</sup>, and eGFP-WIPI1<sup>S69A</sup>  
462 using eGFP-WIPI1<sup>WT</sup> as template following the manufacturer's protocol using primers  
463 (Microsynth) listed in Table 4. Non-mutated template vector was removed from the  
464 PCR mixture through digestion with Dpn1 for 1 h at 37°C. The product was purified  
465 by NucleoSpin PCR clean-up (Macherey-Nagel) and transformed into *Escherichia*  
466 *coli*. Plasmid DNA was purified and sequenced.

467 To generate Vps26-eGFP plasmids, we subcloned *hVPS26* from pmr101A-hVPS26  
468 (Addgene #17636) with primer hVPS26 Fw / hVPS26 Rv (Table 4), into a pcDNA3-  
469 eGFP plasmid (Addgene #13031) using Gibson assembly.

470

#### 471 **SILAC (stable isotope labelling by amino acids in cell culture)**

472 Strains sTC14 and sTC22 were grown to saturation (approx. 1 day) in SC (synthetic  
473 complete, Formedium). 0.5 OD<sub>600</sub> units were transferred into 5 mL of SC-arginine/-  
474 lysine (Sunrise Science Products) supplemented with 0.43 mM arginine and lysine.  
475 Light and stable isotope labeled amino acids (Sigma-Aldrich) were included in  
476 different conditions as described in the following table:

477

| condition   | Control                | WT condition                             | Salt shock                                                   |
|-------------|------------------------|------------------------------------------|--------------------------------------------------------------|
| Strain used | sTC22                  | sTC14                                    | sTC14                                                        |
| Arginine    | R0<br>Light L-Arginine | R6<br>L-Arginine:HCl ( <sup>13</sup> C6) | R10<br>L-Arginine:HCl ( <sup>13</sup> C6 , <sup>15</sup> N4) |
| Lysine      | K0<br>Light L-Lysine   | K4<br>L-Lysine-2HCl (4,4,5,5-D4)         | K8<br>L-Lysine-2HCl ( <sup>13</sup> C6 ; <sup>15</sup> N2)   |

478

479 After 4 hours, these precultures were diluted into 1 Liter cultures. After 15 hours of  
480 culture at 30°C, vacuole fragmentation was triggered in the R10/K8 sample through a  
481 salt shock by addition of 200 mL of SC complete supplemented with 0.43 mM of  
482 R10/K8 and 5 M NaCl. After 5 minutes of shaking, cells were harvested with 5 min  
483 centrifugation (4800 × g, 4°C) in a Beckman JLA-8100 fixed-angle rotor. Cells were  
484 rinsed with ice-cold TGN buffer (50 mM Tris-Cl pH 7.4, 5% glycerol, 100 mM NaCl),  
485 and frozen in liquid nitrogen. Atg18 purification is described below. Before start of the  
486 experiments, tests were carried out to verify that medium and heavy samples were  
487 completely labeled (>99% labeling efficiency), and that no conversion of arginine to  
488 proline was observed.

489

#### 490 **Protein purification**

491

492 *Atg18 purification for MS*

493 For Atg18 purification in SILAC experiments, pellets were thawed on ice in one pellet  
494 volume of TGN lysis buffer (50 mM Tris pH 7.4, 10 % Glycerol, 100 mM NaCl)  
495 supplemented with 0.5% Triton, complete protease inhibitor tablets (Roche),  
496 phosphatase inhibitor tablets (Roche), 1 mM DTT, and 1 mM PMSF. Cells were  
497 passed one time through a French press (Constant Systems LTD) at 4°C with 2.2  
498 kpsi of pressure. Atg18 was isolated by affinity purification using the Gly<sub>6</sub>-FLAG<sub>3</sub> tag  
499 and Dynabeads (Sigma) crosslinked with the FLAG M2 antibody (F1804 epitope,  
500 Sigma). After 1 hour of incubation at 4°C, beads were washed 3 times with TGN  
501 buffer using a magnetic rack, transferred to new Eppendorf tubes, washed with 1 ml  
502 of elution buffer (Tris 50mM pH 7.4), then eluted with 3xFLAG peptide (0.5 mg/mL) in  
503 elution buffer. Eluates were flashed-frozen in liquid nitrogen and placed on a -80°C  
504 freezer before Coomassie staining and MS analysis.

505

#### 506 *Atg18 purification from bacteria*

507 Atg18<sup>WT</sup> and mutant DNA were amplified from the corresponding pRS316 plasmids  
508 and cloned into a pEXP5-NT/TOPO vector (Invitrogen). Plasmids were transformed  
509 into E. coli BL21. A 50 mL preculture overnight was used to inoculate 2 L of LB media  
510 (37°C). Cells were grown to an OD<sub>600</sub> of 0.8–0.9. Cultures were then cooled to 16°C  
511 on ice, and IPTG (Roche) was added to a final concentration of 0.2 mM. Cells were  
512 shaken overnight (200 rpm, 16°C), pelleted, washed once in ice cold lysis buffer (500  
513 mM NaCl, 50 mM Tris pH 7.4, 10 mM KPi), and resuspended in one pellet volume of  
514 lysis buffer with complete EDTA-free protease inhibitor cocktail (Roche) before  
515 purification. Purification was performed as previously described (Gopaldass *et al*,  
516 2017). To conjugate the Dylight550 fluorophore (Thermofisher), proteins were  
517 incubated at room temperature equimolar with the dye in PBS containing 300mM of  
518 NaCl at room temperature protected from light. To remove the excess of fluorophore  
519 proteins were dialysed in PBS with 300mM NaCl overnight at 4°C with a 12kDa cutoff  
520 (ZelluTrans, ROTH).

521

#### 522 *Retromer purification from yeast cells*

523 Strains for yeast purification were provided by Christian Ungermann (University  
524 of Osnabrück) (Purushothaman *et al*, 2017). Yeast precultures were grown in 50 mL  
525 YP-galactose (2%) to stationary phase, diluted in 2 L of YP-galactose and grown at  
526 least 24 h to late log phase (OD<sub>600</sub> of 3). From this point, all steps were performed on



527 ice or at 4°C. Cells were spun down (4800 x g, 5 min, 4°C) in a precooled Beckman  
528 JLA-8100 fixed-angle rotor, resuspended in one pellet volume of PBS (phosphate-  
529 buffered saline, pH 7.4) with 0.4 mM PMSF, pelleted as before, frozen in liquid  
530 nitrogen and stored at -80°C. Pellets were thawed in one pellet volume of RP buffer  
531 (50 mM Tris pH 8.0, 300 mM NaCl, 1 mM MgCl<sub>2</sub>, 1 mM PMSF, Roche Complete  
532 protease inhibitor tablet 1x). Cells were opened using a French press (Constant  
533 Systems LTD, pressure 2.2 kpsi). 5 mg DNase I (from Bovine Pancreas grade II,  
534 Roche) was added to 50 mL of lysate. The lysate was incubated on rotating wheel at  
535 4°C for 20 min, and pre-cleared by centrifugation at 18'500 × g for 30 min in a JLA  
536 25.50 rotor. The supernatant was cleared by centrifugation at 177'520 × g for 90 min  
537 in a Beckmann Ti60 rotor. After aspiration of the upper lipid phase, the cleared  
538 supernatant was passed through a 0.22 μm filter (Millipore) and transferred to a new  
539 50 mL falcon tube. Cleared lysate was incubated with 1 mL IgG Sepharose beads  
540 suspension (6 Fast Flow, GE Healthcare) pre-rinsed with buffer for 20 ml lysate on a  
541 rotating wheel at 4°C for 1 h. Beads were spun down at 3000 × g for 5 min with  
542 minimal deceleration (Eppendorf 5804R) and washed 3 times with RP buffer, then  
543 transferred to new 1.5 mL Eppendorf tube. Beads were resuspended in 1mL of RP  
544 buffer without inhibitors, supplemented with 250 μg of TEV protease. TEV cleavage  
545 was performed at 16°C for 1h. The supernatant was incubated for an additional 20  
546 min at 16°C with Ni-NTA beads to remove TEV protease. The supernatant was then  
547 concentrated on an Amicon Ultra-50 100K filter column at 3000 × g (Eppendorf  
548 5804R) to reach a final volume of 250 μL. Eluates were divided into 10 μl aliquots,  
549 frozen in liquid nitrogen and stored at -80°C until use.

550

## 551 **MS analysis and MS data analysis**

### 552 *Sample preparation*

553 The light-, medium- (Arg6/Lys4) and heavy-labeled (Arg10/Lys8) samples were  
554 mixed and concentrated by a microspin column with a 10 kDa cutoff membrane. 2/3  
555 (for shotgun analysis) and 1/3 (for ubiquitination analysis of atg18 protein) of the  
556 mixed sample was fractionated in separate lanes of a 12% SDS-PAGE gel. For  
557 shotgun analysis, the whole lane was cut in 7 bands and digested, as described  
558 (Shevchenko *et al*, 1996) with sequencing-grade trypsin (Promega). For the  
559 ubiquitination analysis, only two bands between 50 and 150 kDa were cut and  
560 digested, using methyl methanethiosulfonate (MMTS) for cysteine alkylation.

561

## 562 *Mass spectrometry analyses*

563 After digestion, the extracted peptides were analyzed either on a hybrid LTQ Orbitrap  
564 Velos (for the shotgun analysis) or an Orbitrap Fusion Tribrid (for the ubiquitination  
565 analysis) mass spectrometer (Thermo Fisher Scientific, Bremen, Germany)  
566 connected to an Ultimate 3000 RSLC nano HPLC system (Dionex, Sunnyvale, CA,  
567 USA). Solvents used for the mobile phase were 97:3 H<sub>2</sub>O:acetonitrile (v/v) with 0.1 %  
568 formic acid (A) and 20:80 H<sub>2</sub>O:acetonitrile (v/v) with 0.1 % formic acid (B).

569 Peptides were loaded onto a trapping microcolumn Acclaim PepMap100 C18 (20 mm  
570 x 100 µm ID, 5 µm, 100Å, Thermo Scientific), before separation on a reversed-phase  
571 custom packed nanocolumn (75 µm ID × 40 cm, 1.8 µm particles, Reprosil Pur, Dr.  
572 Maisch). A flowrate of 0.3 µl/min was used with a gradient from 4 to 76% acetonitrile  
573 in 0.1% formic acid, with a total method time of 95 (Velos) or 65 min (Fusion).

574 In the Velos instrument, full survey scans were performed at a 60'000 resolution (at  
575 m/z 400). In data-dependent acquisition controlled by Xcalibur software (Thermo  
576 Fisher Scientific), the 10 most intense precursor ions detected in the full MS survey  
577 performed in the Orbitrap (range 350-1500 m/z) were selected and fragmented.  
578 MS/MS was triggered by a minimum signal threshold of 3'000 counts, carried out at  
579 relative collision energy of 35 % and with isolation width of 4.0 amu. Only precursors  
580 with a charge higher than one were selected for CID fragmentation and fragment ions  
581 were analyzed in the ion trap. The m/z of fragmented precursors was then  
582 dynamically excluded from any selection during 30 s.

583 In Fusion mass spectrometer, full survey scans (range 350-1550 m/z) were  
584 performed at a 120'000 resolution (at m/z 200), and a top speed precursor selection  
585 strategy was applied by Xcalibur software to maximize acquisition of peptide tandem  
586 MS spectra with a maximum cycle time of 3.0s. MS/MS was triggered by a minimum  
587 signal threshold of 5'000 counts. HCD fragmentation mode was used at a normalized  
588 collision energy of 32%, with a precursor isolation window of 1.6 m/z. Only  
589 precursors with a charge between 2 and 6 were selected for fragmentation and  
590 MS/MS spectra were acquired in the ion trap. Peptides selected for MS/MS were  
591 excluded from further fragmentation during 60s.

592

## 593 *Data analysis*

594 The SILAC triplex data were processed by the MaxQuant software (version 1.5.1.2)  
595 (Cox & Mann, 2008) incorporating the Andromeda search engine (Cox *et al*, 2011)).  
596 A UniProt yeast (*Saccharomyces cerevisiae*, strain ATCC 204508 / S288c) proteome  
597 database was used (downloaded in October 2014, 6'674 sequences), supplemented  
598 with sequences of common contaminants. Trypsin (cleavage at K,R) was used as the  
599 enzyme definition, allowing 2 missed cleavages.

600 For Velos data, carbamidomethylation of cysteine was specified as a fixed  
601 modification. N-terminal acetylation of protein, oxidation of methionine and  
602 phosphorylation of serine, threonine and tyrosine were specified as variable  
603 modifications. For Fusion data, methylthiolation of cysteine was specified as a fixed  
604 modification. N-terminal acetylation of protein, oxidation of methionine and  
605 ubiquitination of lysine were specified as variable modifications. All identifications  
606 were filtered at 1% FDR at both the peptide and protein levels with default MaxQuant  
607 parameters. MaxQuant data were further processed with Perseus software (Tyanova  
608 *et al*, 2016). Raw data is available in Appendix 2.

609

#### 610 **Retromer co-immunoadsorption**

611 To pull down retromer, 50 mL cultures in SC-URA with 2% D-Glucose were  
612 inoculated from a stationary 24-hour pre-culture in the same medium in and grown  
613 overnight to logarithmic phase ( $OD_{600}$  nm of 0.5 to 1). Cells were spun in 50 ml falcon  
614 tubes in a pre-cooled centrifuge ( $3000 \times g$  / 5 min /  $4^{\circ}C$ ). From this step, all  
615 manipulations were performed on ice or in the cold room. Pellets were resuspended  
616 in 1 ml ice-cold TGN lysis buffer (50 mM Tris pH 7.4, 10 % glycerol, 100 mM NaCl)  
617 supplemented with 0.5% Triton X-100, containing complete protease inhibitor tablets  
618 1x (Roche), phosphatase inhibitor tablets 1x (Roche), 1 mM DTT, and 1 mM PMSF,  
619 and transferred to 2 ml Eppendorf tubes (round bottom). Cells were pelleted on a  
620 bench-top centrifuge at  $800 \times g$  for 3 min (Microfuge 16 – Beckmann Coulter). After  
621 discarding supernatants, cells were resuspended with 200  $\mu$ l of lysis buffer and 100  
622  $\mu$ l of acid-washed glass beads (Sigma–Aldrich). Tubes were vigorously shaken for 10  
623 min on an IKA Vibrax shaker (IKA, Staufen, Germany). After a quick spin, 200  $\mu$ l of  
624 cold TGN lysis buffer was added to the lysate and the lysate was removed from glass  
625 beads using a 200  $\mu$ l pipette tips to avoid transferring glass beads to the new 1.5 ml  
626 Eppendorf tube. The lysate was spun for 10 min at  $10'000 \times g$  on a cold bench-top  
627 centrifuge. Clear lysates were carefully recovered, without touching pellets, and

628 transferred to new 1.5 ml Eppendorf tubes. Protein concentration was assayed in a  
629 Nanodrop1000 (Thermo Fisher Scientific) at 280 nm. Protein concentrations were  
630 equilibrated between samples by diluting with cold TGN lysis buffer, resulting in 500  
631  $\mu$ l of lysates (~10 mg protein), of which 30  $\mu$ l were kept as “Input” controls, and 470  
632  $\mu$ l was incubated with 20  $\mu$ l pre-rinsed (with lysis buffer) RFP-Trap magnetic beads  
633 (Chromotek). After a 1-hour incubation on a rotating wheel, beads were pelleted  
634 using a magnetic separation rack. Beads were washed 3 times with TGN lysis buffer  
635 and transferred to a new Eppendorf tube. After discarding the supernatant, 20  $\mu$ l of  
636 deionized water and 20  $\mu$ l of NuPAGE 4X (Thermo-Fisher) supplemented with 100  
637 mM of DTT were added to the beads. Inputs and eluates were denatured at 90°C for  
638 10 min. After denaturing, beads were pelleted with a magnetic rack and supernatants  
639 were transferred to a new Eppendorf tube to form the “IP” samples. Inputs and IP  
640 were loaded on 10% SDS-polyacrylamide gels.

641

#### 642 **SDS–PAGE and Western blotting**

643 Lysates and eluates from Immunoprecipitations were run on 10% acrylamide gels for  
644 SDS-PAGE, freshly prepared and used the same day: 10% Protogel (30% w/v  
645 acrylamide, 0.8% bisacrylamide (37.5:1 solution, National diagnostics, Atlanta, USA),  
646 380 mM Tris–HCl pH 8.8, 0.1% w/v SDS (Applichem, Darmstadt, Germany), 0.06%  
647 v/v TEMED (Applichem), 0.06% w/v APS (Applichem) for the running gel and 5%  
648 Protogel, 165 mM Tris–HCl pH 6.8, 0.1% w/v SDS, 0.08% v/v TEMED, 0.04% w/v  
649 APS for the stacking gel. Running buffer for SDS–PAGE was 190 mM glycine  
650 (Applichem), 25 mM Tris-base (Applichem), 0.5% SDS. To facilitate Atg18 migration  
651 and avoid formation of aggregates, samples were reduced and denatured at 90°C  
652 using NuPAGE buffer (Thermofisher) containing LDS instead of SDS and  
653 supplemented with 100 mM DTT. Gels were blotted on 0.45  $\mu$ m nitrocellulose  
654 membrane (Amersham) overnight at a constant current of 200 mA using a Trans-  
655 Blot® Cell (Bio-Rad, USA). Membranes were decorated using anti-mCherry-1C51  
656 (Abcam), anti-HA.11-16B12 (BioLegend), anti-G6PDH (Sigma-Aldrich), anti-Tubulin  
657 (clone B5-1-2, Sigma-Aldrich) and anti-WIP1 (C-terminal epitope, Sigma-Aldrich).

658

#### 659 **Native gel electrophoresis**

660 For native gel electrophoresis, purified proteins were mixed, incubated at 25°C for 30  
661 min, supplemented with loading buffer (50 mM BisTris pH 7.2, 6 N HCl, 50 mM NaCl,

662 10% w/v glycerol) and incubated for further 10 min. Then, samples were loaded on  
663 precast Bis-Tris polyacrylamide 4-16% gradient gels (Thermo Fisher Scientific).  
664 Electrophoresis buffers contained 50 mM BisTris, 50 mM Tricine pH 6.8 and were  
665 applied to anode buffer reservoirs. Cathode reservoirs were supplemented in addition  
666 with 0.002% Coomassie G-250. Electrophoresis was carried out at 4 °C for 90 min at  
667 a constant voltage of 150 V. Then, voltage was increased to 250 V for 60 min. Gels  
668 were Western blotted overnight with constant current of 200 mA using a Trans-Blot®  
669 Cell (Bio-Rad, USA). Membranes were destained from residual Coomassie traces by  
670 washes in methanol for several minutes, before blocking and antibody decoration.

671

### 672 **Atg18-CSC dissociation constant**

673 The dissociation constant of CROP was determined by measuring the fluorescence  
674 intensity of a GFP coupled to Vps29. We noted that the fluorescence properties of  
675 this tagged protein changed because of Atg18 binding and exploited this effect to  
676 follow the binding event. Pure recombinant Atg18 was titrated from 0 to 75 μM by  
677 serial 1:1 dilution in PBS and supplemented with 2.5 nM of CSC-GFP, giving a final  
678 volume of 100 μL. After incubation at 30°C during 30 min, fluorescence was  
679 measured in microtiter plates using a SpectraMax Gemini EM spectrofluorometer  
680 (excitation 488 nm, emission 525 nm, cutoff 520 nm). Experiments were repeated  
681 three times. K<sub>d</sub> was determined using nonlinear regression curve fitting (One site-  
682 Total) in GraphPad Prism9.

683

### 684 **Live microscopy and vacuole fragmentation**

#### 685 *Live-cell imaging, FM4-64 staining, and fragmentation assay*

686 Cells were inoculated from a stationary pre-culture (SC-URA or YP) supplemented  
687 with 2% D-glucose and grown overnight to logarithmic phase (OD<sub>600</sub> nm between 0.5  
688 and 1). After dilution to OD<sub>600</sub> = 0.5 in 1 ml culture, 10 μM FM4-64 was added from a  
689 10 mM stock in DMSO. Cells were incubated (1 h, 30°C, 180 rpm), followed by three  
690 washing steps with medium without FM4-64 (2 min, 3,000 × g) and a chase of 1h in  
691 medium without FM4-64. For induction of vacuole fragmentation, NaCl was added to  
692 the media to a final concentration of 0.4 M and cells were imaged at 0, 15, and 30  
693 min after its addition. Cells were removed from the shaker, concentrated by a brief  
694 low-speed centrifugation, placed on a glass microscopy slide and imaged  
695 immediately. Z-stacks with a spacing of 0.3 μm were recorded on a NIKON Ti2E



696 Yokogawa spinning disc confocal microscope with a 100x 1.49 NA objective and  
697 Photometrics Prime BSI cameras. Image analysis was performed with ImageJ.

698

### 699 **Liposome preparation and microscope imaging**

700 Lipids were purchased from Avanti Polar Lipids (USA): Egg L- $\alpha$ -phosphatidylcholine  
701 (EggPC); 1,2-dioleoyl-sn-glycero-3-phospho-L-serine sodium salt (PS); 1,2-dioleoyl-  
702 sn-glycero-3-phospho-(1'-myo-inositol-3'-phosphate) (PI3P); 1,2-dioleoyl-sn-glycero-  
703 3-phospho-(1'-myo-inositol-3',5'-bisphosphate) (P(3,5)P<sub>2</sub>), 1,2-dioleoyl-sn-glycero-3-  
704 phosphoethanolamine-N-(Cyanine 5.5) (Cy5.5-PE) and porcine brain polar lipid  
705 extract (PL). All lipids were dissolved in chloroform and phosphatidylinositol  
706 phosphates were dissolved in chloroform/methanol/water (20:10:1).

707 Small unilamellar vesicles (SUVs) contained phospholipids in the following ratios:  
708 89.5% PL + 5% PI3P + 5% PI(3,5)P<sub>2</sub> supplemented with 0.5% Cy5.5-PE. SUVs were  
709 prepared as described (Baskaran *et al*, 2012). Lipids from stock solutions were  
710 diluted in chloroform in a glass tube and the solvent evaporated under argon flux  
711 while gently vortexing the tube. Tubes were dried at 55°C in vacuum for 1 h in order  
712 to remove traces of solvents. Retromer SUV buffer (20 mM HEPES pH 6.8, 50 mM  
713 KAc, 130 mM Sucrose, 10  $\mu$ M ZnCl<sub>2</sub>) was added (final lipid concentration 5 mg/ml),  
714 and the tubes were placed in an oven at 37°C to hydrate the lipid film for 1 hour. After  
715 vortexing, lipids were transferred to an Eppendorf tube and frozen and thawed three  
716 times using liquid nitrogen. SUVs were prepared on the day of experiment or kept at  
717 -20°C and used within a week. SUVs were incubated with purified CSC-GFP (1.5  
718  $\mu$ M) for 10 min at room temperature (25°C) alone or in addition with recombinant  
719 Atg18<sup>WT</sup>, Atg18<sup>F<sup>GGG</sup></sup> or Atg18<sup>T<sup>56E</sup></sup> (1.5  $\mu$ M). The suspension was spun for 10 min at  
720 10'000  $\times$  g in a bench-top centrifuge and the supernatants and pellets were  
721 analyzed by SDS-PAGE and Coomassie staining.

722

723 Giant Unilamellar Vesicles (GUVs) were made with the following lipid composition:  
724 89.5% PC, 5% PS, 2.5% PI3P, 2.5% PI(3,5)P<sub>2</sub>, supplemented with 0.5% Cy5.5-PE.  
725 To prepare GUVs, we followed the electro-formation method (Angelova *et al*, 1992).  
726 Freshly prepared lipid mix in chloroform was deposited on indium-titan oxide glass  
727 slides and dried for 1 hour at 55°C to evaporate all solvents in a vacuum oven. After  
728 mounting a chamber from 2 glass slides and an O-ring filled with a 250 mM  
729 saccharose solution, GUVs were electro-formed at 1 V and 10 Hz for 60 min at 55°C.



730 GUV solution was removed from the chamber by careful pipetting with a cut tip and  
731 placed in a 1.5 ml siliconized microcentrifuge tube. To purify the GUVs and remove  
732 excess lipids, GUVs from two chambers were pooled and an equivalent volume of  
733 retromer GUV buffer (20 mM HEPES pH 6.8, 115 mM KAc, 10  $\mu$ M ZnCl<sub>2</sub>) was added  
734 to facilitate sedimentation in an Eppendorf swing bucket rotor for microcentrifuges  
735 (200  $\times$  g / 5min / RT). The supernatant was removed without touching the GUV pellet  
736 (~50  $\mu$ l). After washing a second time with the retromer GUV buffer, the supernatant  
737 was removed, and GUVs were resuspended in 150  $\mu$ l of retromer GUV buffer. GUVs  
738 were used immediately for imaging.

739  
740 For imaging, 10  $\mu$ l of GUV suspension was added to 50  $\mu$ l of retromer GUV buffer  
741 containing Atg18 protein at 25 nM concentration in a 96-well clear bottom plate  
742 (Greiner Bio-One, Thermo Fisher Scientific) pre-coated with solution of BSA  
743 dissolved in water (1 mg/ml) for 30 min. GUVs were left to sediment for 30 min.  
744 Imaging was done with a NIKON Ti2E spinning disc confocal microscope. Large  
745 image acquisition was generated by automatically stitching 5x5 fields from multiple  
746 adjacent frames. A minimum of 5 acquisitions were performed in different regions of  
747 the well. Picture analysis was performed with ImageJ.

748

#### 749 **Mammalian cell experiments**

750 All chemical reagents were from Sigma-Aldrich unless otherwise specified. Other  
751 reagents: Opti-MEM and Trypsin (Gibco® by Life Technologies); Alexa Fluor®568-  
752 conjugated Transferrin from Human Serum (Thermo Fisher Scientific).

753

#### 754 *Cell culture, transfection and treatments*

755 HK2 cells were grown in DMEM-HAM's F12 (GIBCO-Life Technologies);  
756 supplemented with 5% fetal calf serum, 50 IU/mL penicillin, 50 mg/mL streptomycin,  
757 5  $\mu$ g/mL insulin, 5  $\mu$ g/mL transferrin, 5 ng/mL selenium (LuBio Science). Cells were  
758 grown at 37°C in 5% CO<sub>2</sub> and at 98% humidity. Media, serum and reagents for tissue  
759 culture were purchased from GIBCO (Invitrogen).

760 HK2 cells were transfected with different plasmids using X-tremeGENE HP DNA  
761 transfection reagent (Sigma-Aldrich) according to the manufacturer's instructions and  
762 incubated for 18-24 h before fixation or live-cell imaging. The HK-2 cell line was

763 checked for mycoplasma contamination by a PCR-based method. All cell-based  
764 experiments were repeated at least three times.

765

#### 766 *Knockouts and RNA interference*

767 HK2 WIPI1-KO cells were produced by using the CRISPR/Cas9 system as described  
768 (De Leo *et al*, 2021). For RNA interference, HK2 cells were transfected with siRNA  
769 for 72 h using Lipofectamine RNAiMax (Thermo Fisher Scientific) according to the  
770 manufacturer's instructions. The siRNA targeting VPS35 was from Sigma (5'  
771 CTGGACATATTTATCAATATA 3'; 3' TATATTGATAAATATGTCCAG 5'). It was  
772 used at 20 nM final concentration. Control cells were treated with identical  
773 concentrations of siGENOME Control Pool Non-Targeting from Dharmacon (D-  
774 001206-13-05).

775

#### 776 *Transferrin recycling*

777 HK2 cells were serum-starved for 1 h at 37 °C, washed twice in cold PBS with 1%  
778 BSA, and then exposed to 100 µg/ml Alexa-Fluor-488-Tf for 1 h at 37 °C (LOAD).  
779 After extensive washing with complete fresh HEPES-buffered serum free-medium,  
780 the recycling of Tf was followed by incubating the cells in Tf-free complete medium  
781 (CHASE) for 1 h at 37 °C. The cells were acid-washed (150 mM NaCl, 10 mM acetic  
782 acid, pH 3.5) before fixation.

783

#### 784 **Immunostaining**

785 HK2 cells were grown to 70% confluence on glass coverslips before  
786 immunofluorescence microscopy was performed. Cells were fixed for 8 min in 0.2%  
787 glutaraldehyde and 2% paraformaldehyde in PBS. This condition favors preservation  
788 of tubular endosomal structures although not to the extent seen by live microscopy.  
789 After fixation, cells were permeabilized in 0.1% (w:v) saponin (Sigma-Aldrich,  
790 558255), 0.5% (w:v) BSA and 50 mM NH<sub>4</sub>Cl in PBS (blocking buffer) for 30 min at  
791 room temperature. The cells were incubated for 1 h with primary antibodies (anti-  
792 LAMP1 H4A3 from USBiologicvak Life Sciences) in blocking buffer, washed three  
793 times in PBS, incubated for 1 h with the secondary antibody (Cy3-conjugated  
794 AffiniPure Donkey anti-Mouse IgG H+L from Jackson Immuno Research), washed  
795 three times in PBS, mounted with Mowiol (Sigma-Aldrich, 475904-M) on slides and  
796 analyzed by confocal microscopy.

797

798 *Confocal fluorescence microscopy and image processing.*

799 Confocal microscopy was performed on an inverted confocal laser microscope (Zeiss

800 LSM 880 with airyscan) with a 63x 1.4 NA oil immersion lens. Z-stack Images were

801 acquired on a Zeiss LSM880 microscope with Airyscan. Tf-fluorescence was

802 quantified in CTR and WIP11-KO cells using ImageJ. z-stacks were compressed into

803 a single plane using the 'maximum intensity Z-projection' function in Image J.

804 Individual cells were selected using the freeform drawing tool to create a ROI (ROI).

805 The 'Measure' function provided the area, the mean grey value and integrated

806 intensity of the ROI. The mean background level was obtained by measuring the

807 intensity in three different regions outside the cells, dividing them by the area of the

808 regions measured, and averaging the values obtained. This background noise was

809 removed from each cell, yielding the CTCF (corrected total cell fluorescence):

810  $CTCF = \text{integrated intensity of cell ROI} - (\text{area of ROI} \times \text{mean fluorescence of}$   
811  $\text{background}).$

812 To quantify the degree of co-localisation, confocal z-stacks were acquired, single

813 channels from each image in 8-bit format were thresholded to subtract background

814 and then the "Just Another Colocalisation Plug-in" (JACOP) of ImageJ was used to

815 measure the Pearson's correlation coefficient.

816

## 817 **Statistics**

818 Where averages were calculated, the values stemmed from experiments that were

819 performed independently. Significance of differences was tested by a two-tailed t-

820 test.

821

822

823

824

825

## 826 **Acknowledgements**

827 We thank Véronique Comte-Misérez for assistance in protein purification, Manfredo

828 Quadroni for the MS analysis of the SILAC experiment, and C. Ungermann for strains

829 expressing CSC and SNX.

830

831

832 **Author contributions**

833

834 TC performed Atg18 interaction studies and yeast experiments. Liposome  
835 experiments were performed by TC. Their establishment and analysis was supported  
836 by NG. MGDL performed experiments with mammalian cells. AM conceived the  
837 study. All authors analyzed data and jointly wrote the manuscript.

838

839

840

841 **References**

842

843 Antony B, Burd C, De Camilli P, Chen E, Daumke O, Faelber K, Ford M, Frolov VA,  
844 Frost A, Hinshaw JE, Kirchhausen T, Kozlov MM, Lenz M, Low HH, McMahon H,  
845 Merrifield C, Pollard TD, Robinson PJ, Roux A & Schmid S (2016) Membrane  
846 fission by dynamin: what we know and what we need to know. *EMBO J*:  
847 e201694613

848 Arlt H, Reggiori F & Ungermann C (2015) Retromer and the dynamin Vps1 cooperate  
849 in the retrieval of transmembrane proteins from vacuoles. *J Cell Sci* **128**: 645–  
850 655

851 Bakula D, Müller AJ, Zuleger T, Takacs Z, Franz-Wachtel M, Thost A-K, Brigger D,  
852 Tschan MP, Frickey T, Robenek H, Macek B & Proikas-Cezanne T (2017) WIPI3  
853 and WIPI4  $\beta$ -propellers are scaffolds for LKB1-AMPK-TSC signalling circuits in  
854 the control of autophagy. *Nature communications* **8**: 15637

855 Balderhaar HJK, Arlt H, Ostrowicz C, Bröcker C, Sündermann F, Brandt R, Babst M  
856 & Ungermann C (2010) The Rab GTPase Ypt7 is linked to retromer-mediated  
857 receptor recycling and fusion at the yeast late endosome. *J Cell Sci* **123**: 4085–  
858 4094

859 Bar-Ziv R, Tlusty T, Moses E, Safran SA & Bershadsky A (1999) Pearling in cells: a  
860 clue to understanding cell shape. *PNAS* **96**: 10140–10145

861 Baskaran S, Ragusa MJ, Boura E & Hurley JH (2012) Two-Site Recognition of  
862 Phosphatidylinositol 3-Phosphate by PROPPINs in Autophagy. *Mol Cell* **47**: 339–  
863 348

864 Bonangelino CJ, Nau JJ, Duex JE, Brinkman M, Wurmser AE, Gary JD, Emr SD &  
865 Weisman LS (2002) Osmotic stress-induced increase of phosphatidylinositol 3,5-  
866 bisphosphate requires Vac14p, an activator of the lipid kinase Fab1p. *J Cell Biol*  
867 **156**: 1015–1028

868 Boucrot E, Pick A, Camdere G, Liska N, Evergren E, McMahon HT & Kozlov MM  
869 (2012) Membrane Fission Is Promoted by Insertion of Amphipathic Helices and Is  
870 Restricted by Crescent BAR Domains. *Cell* **149**: 124–136

871 Burda P, Padilla SM, Sarkar S & Emr SD (2002) Retromer function in endosome-to-  
872 Golgi retrograde transport is regulated by the yeast Vps34 PtdIns 3-kinase. *J Cell*  
873 *Sci* **115**: 3889–3900

874 Busse RA, Scacioc A, Krick R, Pérez-Lara A, Thumm M & Kühnel K (2015)  
875 Characterization of PROPPIN-Phosphoinositide Binding and Role of Loop 6CD in  
876 PROPPIN-Membrane Binding. *Biophys J* **108**: 2223–2234

877 Campelo F, McMahon HT & Kozlov MM (2008) The hydrophobic insertion  
878 mechanism of membrane curvature generation by proteins. *Biophys J* **95**: 2325–  
879 2339

- 880 Chen K-E, Healy MD & Collins BM (2019) Towards a molecular understanding of  
881 endosomal trafficking by Retromer and Retriever. *Traffic*: tra.12649
- 882 Chi RJ, Liu J, West M, Wang J, Odorizzi G & Burd CG (2014) Fission of SNX-BAR-  
883 coated endosomal retrograde transport carriers is promoted by the dynamin-  
884 related protein Vps1. *J Cell Biol* **204**: 793–806
- 885 Chowdhury S, Otomo C, Leitner A, Ohashi K, Aebersold R, Lander GC & Otomo T  
886 (2018) Insights into autophagosome biogenesis from structural and biochemical  
887 analyses of the ATG2A-WIPI4 complex. *Proc. Natl. Acad. Sci. U.S.A.* **58**:  
888 201811874
- 889 Collins BM, Norwood SJ, Kerr MC, Mahony D, Seaman MNJ, Teasdale RD & Owen  
890 DJ (2008) Structure of Vps26B and mapping of its interaction with the retromer  
891 protein complex. *Traffic* **9**: 366–379
- 892 Collins BM, Skinner CF, Watson PJ, Seaman MNJ & Owen DJ (2005) Vps29 has a  
893 phosphoesterase fold that acts as a protein interaction scaffold for retromer  
894 assembly. *Nat Struct Mol Biol* **12**: 594–602
- 895 Cooke FT, Dove SK, McEwen RK, Painter G, Holmes AB, Hall MN, Michell RH &  
896 Parker PJ (1998) The stress-activated phosphatidylinositol 3-phosphate 5-kinase  
897 Fab1p is essential for vacuole function in *S. cerevisiae*. *Curr Biol* **8**: 1219–1222
- 898 Cox J & Mann M (2008) MaxQuant enables high peptide identification rates,  
899 individualized p.p.b.-range mass accuracies and proteome-wide protein  
900 quantification. *Nat Biotechnol* **26**: 1367–1372
- 901 Cox J, Neuhauser N, Michalski A, Scheltema RA, Olsen JV & Mann M (2011)  
902 Andromeda: a peptide search engine integrated into the MaxQuant environment.  
903 *J. Proteome Res.* **10**: 1794–1805
- 904 Cullen PJ & Steinberg F (2018) To degrade or not to degrade: mechanisms and  
905 significance of endocytic recycling. *Nat Rev Mol Cell Biol* **19**: 679–696
- 906 Da Jia, Zhang J-S, Li F, Wang J, Deng Z, White MA, Osborne DG, Phillips-Krawczak  
907 C, Gomez TS, Li H, Singla A, Burstein E, Billadeau DD & Rosen MK (2016)  
908 Structural and mechanistic insights into regulation of the retromer coat by  
909 TBC1d5. *Nature communications* **7**: 1–11
- 910 Daumke O, Lundmark R, Vallis Y, Martens S, Butler PJG & McMahon HT (2007)  
911 Architectural and mechanistic insights into an EHD ATPase involved in  
912 membrane remodelling. *Nature* **449**: 923–927
- 913 Dautry-Varsat A, Ciechanover A & Lodish HF (1983) pH and the recycling of  
914 transferrin during receptor-mediated endocytosis. *PNAS* **80**: 2258–2262
- 915 Day KJ, Casler JC & Glick BS (2018) Budding Yeast Has a Minimal Endomembrane  
916 System. *Dev Cell* **44**: 56–72.e4



- 917 De Leo MG, Berger P & Mayer A (2021) WIPI1 promotes fission of endosomal  
918 transport carriers and formation of autophagosomes through distinct  
919 mechanisms. *Autophagy*: 1–27
- 920 Deo R, Kushwah MS, Kamerkar SC, Kadam NY, Dar S, Babu K, Srivastava A &  
921 Pucadyil TJ (2018) ATP-dependent membrane remodeling links EHD1 functions  
922 to endocytic recycling. *Nature communications* **9**: 5187
- 923 Derivery E, Sousa C, Gautier JJ, Lombard B, Loew D & Gautreau A (2009) The  
924 Arp2/3 activator WASH controls the fission of endosomes through a large  
925 multiprotein complex. *Dev Cell* **17**: 712–723
- 926 Dooley HC, Razi M, Polson HEJ, Girardin SE, Wilson MI & Tooze SA (2014) WIPI2  
927 links LC3 conjugation with PI3P, autophagosome formation, and pathogen  
928 clearance by recruiting Atg12-5-16L1. *Mol Cell* **55**: 238–252
- 929 Dove SK, Piper RC, McEwen RK, Yu JW, King MC, Hughes DC, Thuring J, Holmes  
930 AB, Cooke FT, Michell RH, Parker PJ & Lemmon MA (2004) Svp1p defines a  
931 family of phosphatidylinositol 3,5-bisphosphate effectors. *EMBO J* **23**: 1922–1933
- 932 Efe JA, Botelho RJ & Emr SD (2007) Atg18 regulates organelle morphology and  
933 Fab1 kinase activity independent of its membrane recruitment by  
934 phosphatidylinositol 3,5-bisphosphate. *Mol. Biol. Cell* **18**: 4232–4244
- 935 Feng W, Zhang W, Wang H, Ma L, Miao D, Liu Z, Xue Y, Deng H & Yu L (2015)  
936 Analysis of phosphorylation sites on autophagy proteins. *Protein Cell* **6**: 698–701
- 937 Gokool S, Tattersall D & Seaman MNJ (2007) EHD1 interacts with retromer to  
938 stabilize SNX1 tubules and facilitate endosome-to-Golgi retrieval. *Traffic* **8**: 1873–  
939 1886
- 940 Gomez TS & Billadeau DD (2009) A FAM21-containing WASH complex regulates  
941 retromer-dependent sorting. *Dev Cell* **17**: 699–711
- 942 Gopaldass N, Fauvet B, Lashuel H, Roux A & Mayer A (2017) Membrane scission  
943 driven by the PROPPIN Atg18. *EMBO J* **36**: 3274–3291
- 944 Harbour ME, Breusegem SY & Seaman MNJ (2012) Recruitment of the endosomal  
945 WASH complex is mediated by the extended ‘tail’ of Fam21 binding to the  
946 retromer protein Vps35. *Biochem J* **442**: 209–220
- 947 Hierro A, Rojas AL, Rojas R, Murthy N, Effantin G, Kajava AV, Steven AC,  
948 Bonifacino JS & Hurley JH (2007) Functional architecture of the retromer cargo-  
949 recognition complex. *Nature* **449**: 1063–1067
- 950 Itakura E & Mizushima N (2010) Characterization of autophagosome formation site  
951 by a hierarchical analysis of mammalian Atg proteins. *Autophagy* **6**: 764–776
- 952 Jeffries TR, Dove SK, Michell RH & Parker PJ (2004) PtdIns-specific MPR pathway  
953 association of a novel WD40 repeat protein, WIPI49. *Mol. Biol. Cell* **15**: 2652–  
954 2663

- 955 Jia D, Gomez TS, Billadeau DD & Rosen MK (2012) Multiple repeat elements within  
956 the FAM21 tail link the WASH actin regulatory complex to the retromer. *Mol. Biol.*  
957 *Cell* **23**: 2352–2361
- 958 Kendall AK, Xie B, Xu P, Wang J, Burcham R, Frazier MN, Binshtein E, Wei H,  
959 Graham TR, Nakagawa T & Jackson LP (2020) Mammalian Retromer Is an  
960 Adaptable Scaffold for Cargo Sorting from Endosomes. *Structure* **28**: 393–405.e4
- 961 Kovtun O, Leneva N, Bykov YS, Ariotti N, Teasdale RD, Schaffer M, Engel BD, Owen  
962 DJ, Briggs JAG & Collins BM (2018) Structure of the membrane-assembled  
963 retromer coat determined by cryo-electron tomography. *Nature* **561**: 561–564
- 964 Krick R, Busse RA, Scacioc A, Stephan M, Janshoff A, Thumm M & Kühnel K (2012)  
965 Structural and functional characterization of the two phosphoinositide binding  
966 sites of PROPPINs, a  $\beta$ -propeller protein family. *Proc. Natl. Acad. Sci. U.S.A.*  
967 **109**: E2042–9
- 968 Lei Y, Tang D, Liao G, Xu L, Liu S, Chen Q, Li C, Duan J, Wang K, Wang J, Sun B,  
969 Li Z, Dai L, Cheng W, Qi S & Lu K (2020) The crystal structure of Atg18 reveals a  
970 new binding site for Atg2 in *Saccharomyces cerevisiae*. *Cell Mol Life Sci* **290**:  
971 1717–13
- 972 Li J-G, Chiu J & Praticò D (2019) Full recovery of the Alzheimer's disease phenotype  
973 by gain of function of vacuolar protein sorting 35. *Mol. Psychiatry* **8**: 5659
- 974 Liang R, Ren J, Zhang Y & Feng W (2019) Structural Conservation of the Two  
975 Phosphoinositide-Binding Sites in WIPI Proteins. *J Mol Biol* **431**: 1494–1505
- 976 Liu T-T, Gomez TS, Sackey BK, Billadeau DD & Burd CG (2012) Rab GTPase  
977 regulation of retromer-mediated cargo export during endosome maturation. *Mol.*  
978 *Biol. Cell* **23**: 2505–2515
- 979 Lu Q, Yang P, Huang X, Hu W, Guo B, Wu F, Lin L, Kovács AL, Yu L & Zhang H  
980 (2011) The WD40 Repeat PtdIns(3)P-Binding Protein EPG-6 Regulates  
981 Progression of Omegasomes to Autophagosomes. *Dev Cell*
- 982 Lucas M, Gershlick DC, Vidaurrazaga A, Rojas AL, Bonifacino JS & Hierro A (2016)  
983 Structural Mechanism for Cargo Recognition by the Retromer Complex. *Cell* **167**:  
984 1623–1635.e14
- 985 Ma M & Burd CG (2019) Retrograde trafficking and plasma membrane recycling  
986 pathways of the budding yeast *Saccharomyces cerevisiae*. *Traffic*: tra.12693
- 987 Markin VS, Tanelian DL, Jersild RA & Ochs S (1999) Biomechanics of stretch-  
988 induced beading. *Biophys J* **76**: 2852–2860
- 989 McCartney AJ, Zhang Y & Weisman LS (2014) Phosphatidylinositol 3,5-  
990 bisphosphate: low abundance, high significance. *BioEssays* **36**: 52–64
- 991 McMillan KJ, Korswagen HC & Cullen PJ (2017) The emerging role of retromer in  
992 neuroprotection. *Curr Opin Cell Biol* **47**: 72–82

- 993 Michailat L & Mayer A (2013) Identification of Genes Affecting Vacuole Membrane  
994 Fragmentation in *Saccharomyces cerevisiae*. *PLoS ONE* **8**: e54160
- 995 Michailat L, Baars TL & Mayer A (2012) Cell-free reconstitution of vacuole  
996 membrane fragmentation reveals regulation of vacuole size and number by  
997 TORC1. *Mol. Biol. Cell* **23**: 881–895
- 998 Obara K, Sekito T, Niimi K & Ohsumi Y (2008) The Atg18-Atg2 complex is recruited  
999 to autophagic membranes via phosphatidylinositol 3-phosphate and exerts an  
1000 essential function. *Journal of Biological Chemistry* **283**: 23972–23980
- 1001 Otomo T, Chowdhury S & Lander GC (2018) The rod-shaped ATG2A-WIPI4 complex  
1002 tethers membranes in vitro. *Contact (Thousand Oaks)* **1**: 251525641881993
- 1003 Peters C, Baars TL, Buhler S & Mayer A (2004) Mutual control of membrane fission  
1004 and fusion proteins. *Cell* **119**: 667–678
- 1005 Phillips-Krawczak CA, Singla A, Starokadomskyy P, Deng Z, Osborne DG, Li H, Dick  
1006 CJ, Gomez TS, Koenecke M, Zhang J-S, Dai H, Sifuentes-Dominguez LF, Geng  
1007 LN, Kaufmann SH, Hein MY, Wallis M, McGaughran J, Gecz J, Sluis BV de,  
1008 Billadeau DD, et al (2015) COMMD1 is linked to the WASH complex and  
1009 regulates endosomal trafficking of the copper transporter ATP7A. *Mol. Biol. Cell*  
1010 **26**: 91–103
- 1011 Polson HEJ, de Lartigue J, Rigden DJ, Reedijk M, Urbé S, Clague MJ & Tooze SA  
1012 (2010) Mammalian Atg18 (WIPI2) localizes to omegasome-anchored  
1013 phagophores and positively regulates LC3 lipidation. *Autophagy* **6**: 506–522
- 1014 Proikas-Cezanne T, Takacs Z, Dönnes P & Kohlbacher O (2015) WIPI proteins:  
1015 essential PtdIns3P effectors at the nascent autophagosome. *J Cell Sci* **128**: 207–  
1016 217
- 1017 Proikas-Cezanne T, Waddell S, Gaugel A, Frickey T, Lupas A & Nordheim A (2004)  
1018 WIPI-1alpha (WIPI49), a member of the novel 7-bladed WIPI protein family, is  
1019 aberrantly expressed in human cancer and is linked to starvation-induced  
1020 autophagy. *Oncogene* **23**: 9314–9325
- 1021 Purushothaman LK & Ungermann C (2018) Cargo induces retromer-mediated  
1022 membrane remodeling on membranes. *Mol. Biol. Cell* **29**: 2709–2719
- 1023 Purushothaman LK, Arlt H, Kuhlee A, Raunser S & Ungermann C (2017) Retromer-  
1024 driven membrane tubulation separates endosomal recycling from Rab7/Ypt7-  
1025 dependent fusion. *Mol. Biol. Cell* **28**: 783–791
- 1026 Rahman AA & Morrison BE (2019) Contributions of VPS35 Mutations to Parkinson's  
1027 Disease. *Neuroscience* **401**: 1–10
- 1028 Raymond CK, Howald-Stevenson I, Vater CA & Stevens TH (1992) Morphological  
1029 classification of the yeast vacuolar protein sorting mutants: evidence for a  
1030 prevacuolar compartment in class E vps mutants. **3**: 1389–1402

- 1031 Rieter E, Vinke F, Bakula D, Cebollero E, Ungermann C, Proikas-Cezanne T &  
1032 Reggiori F (2013) Atg18 function in autophagy is regulated by specific sites within  
1033 its  $\beta$ -propeller. *J Cell Sci* **126**: 593–604
- 1034 Rojas R, Kametaka S, Haft CR & Bonifacino JS (2007) Interchangeable but essential  
1035 functions of SNX1 and SNX2 in the association of retromer with endosomes and  
1036 the trafficking of mannose 6-phosphate receptors. *Mol Cell Biol* **27**: 1112–1124
- 1037 Rojas R, van Vlijmen T, Mardones GA, Prabhu Y, Rojas AL, Mohammed S, Heck  
1038 AJR, Raposo G, van der Sluijs P & Bonifacino JS (2008) Regulation of retromer  
1039 recruitment to endosomes by sequential action of Rab5 and Rab7. *J Cell Biol*  
1040 **183**: 513–526
- 1041 Rowland AA, Chitwood PJ, Phillips MJ & Voeltz GK (2014) ER contact sites define  
1042 the position and timing of endosome fission. *Cell* **159**: 1027–1041
- 1043 Scacioc A, Schmidt C, Hofmann T, Urlaub H, Kühnel K & Pérez-Lara A (2017)  
1044 Structure based biophysical characterization of the PROPPIN Atg18 shows Atg18  
1045 oligomerization upon membrane binding. *Sci Rep* **7**: 14008
- 1046 Seaman MN, McCaffery JM & Emr SD (1998) A membrane coat complex essential  
1047 for endosome-to-Golgi retrograde transport in yeast. *J Cell Biol* **142**: 665–681
- 1048 Seaman MNJ (2019) Back From the Brink: Retrieval of Membrane Proteins From  
1049 Terminal Compartments: Unexpected Pathways for Membrane Protein Retrieval  
1050 From Vacuoles and Endolysosomes. *BioEssays* **41**: e1800146
- 1051 Seaman MNJ, Harbour ME, Tattersall D, Read E & Bright N (2009) Membrane  
1052 recruitment of the cargo-selective retromer subcomplex is catalysed by the small  
1053 GTPase Rab7 and inhibited by the Rab-GAP TBC1D5. *J Cell Sci* **122**: 2371–  
1054 2382
- 1055 Shevchenko A, Wilm M, Vorm O & Mann M (1996) Mass spectrometric sequencing  
1056 of proteins silver-stained polyacrylamide gels. *Anal. Chem.* **68**: 850–858
- 1057 Simunovic M, Manneville J-B, Renard H-F, Evergren E, Raghunathan K, Bhatia D,  
1058 Kenworthy AK, Voth GA, Prost J, McMahon HT, Johannes L, Bassereau P &  
1059 Callan-Jones A (2017) Friction Mediates Scission of Tubular Membranes  
1060 Scaffolded by BAR Proteins. *Cell* **170**: 172–184.e11
- 1061 Stanga D, Zhao Q, Milev MP, Saint-Dic D, Jimenez-Mallebrera C & Sacher M (2019)  
1062 TRAPPC11 functions in autophagy by recruiting ATG2B-WIPI4/WDR45 to  
1063 preautophagosomal membranes. *Traffic* **20**: 325–345
- 1064 Stromhaug PE, Reggiori F, Guan J, Wang C-W & Klionsky DJ (2004) Atg21 is a  
1065 phosphoinositide binding protein required for efficient lipidation and localization of  
1066 Atg8 during uptake of aminopeptidase I by selective autophagy. *Mol. Biol. Cell*  
1067 **15**: 3553–3566
- 1068 Temkin P, Lauffer B, Jäger S, Cimermancic P, Krogan NJ & Zastrow von M (2011)  
1069 SNX27 mediates retromer tubule entry and endosome-to-plasma membrane  
1070 trafficking of signalling receptors. *Nat Cell Biol* **13**: 715–721

- 1071 Tyanova S, Temu T, Sinitcyn P, Carlson A, Hein MY, Geiger T, Mann M & Cox J  
1072 (2016) The Perseus computational platform for comprehensive analysis of  
1073 (prote)omics data. *Nat Methods* **13**: 731–740
- 1074 van Weering JRT, Sessions RB, Traer CJ, Kloer DP, Bhatia VK, Stamou D, Carlsson  
1075 SR, Hurley JH & Cullen PJ (2012) Molecular basis for SNX-BAR-mediated  
1076 assembly of distinct endosomal sorting tubules. *EMBO J* **31**: 4466–4480
- 1077 Vicinanza M, Korolchuk VI, Ashkenazi A, Puri C, Menzies FM, Clarke JH &  
1078 Rubinsztein DC (2015) PI(5)P regulates autophagosome biogenesis. *Mol Cell* **57**:  
1079 219–234
- 1080 Watanabe Y, Kobayashi T, Yamamoto H, Hoshida H, Akada R, Inagaki F, Ohsumi Y  
1081 & Noda NN (2012) Structure-based analyses reveal distinct binding sites for Atg2  
1082 and phosphoinositides in Atg18. *J. Biol. Chem.* **287**: 31681–31690
- 1083 Zieger M & Mayer A (2012) Yeast vacuoles fragment in an asymmetrical two-phase  
1084 process with distinct protein requirements. *Mol. Biol. Cell* **23**: 3438–3449
- 1085
- 1086

1087 **Tables**

1088

1089 **Table 1: Atg18 interactors identified in the SILAC approach**

1090

| <b>Gene Name</b> | <b>Protein Name</b>                             | <b>Log2 Ratio (Standard media/Control)</b> | <b>Log2 Ratio (Hyperosmotic Shock/Control)</b> | <b>Log2 Ratio (Hyperosmotic shock/Standard media)</b> |
|------------------|-------------------------------------------------|--------------------------------------------|------------------------------------------------|-------------------------------------------------------|
| <i>ATG18</i>     | Autophagy-related protein 18                    | 8.1                                        | 8.3                                            | 0.06                                                  |
| <i>ATG2</i>      | Autophagy-related protein 2                     | 5.3                                        | 4.9                                            | -0.40                                                 |
| <i>BUB1</i>      | Checkpoint Serine/Threonine-protein kinase Bub1 | 4.9                                        | 4.5                                            | -0.34                                                 |
| <i>SAP155</i>    | SIT4-associated protein Sap155                  | 3.5                                        | 4.2                                            | 0.56                                                  |
| <i>GIS3</i>      | Protein Gis3                                    | 1.6                                        | 2.7                                            | 0.97                                                  |
| <i>SIT4</i>      | Serine/threonine-protein phosphatase PP1-1      | 1.8                                        | 2.7                                            | 0.74                                                  |
| <i>CDC55</i>     | Protein phosphatase PP2A regulatory subunit B   | 1.1                                        | 2.0                                            | 1.04                                                  |
| <i>VPS35</i>     | Vacuolar protein sorting-associated protein 35  | 1.1                                        | 1.6                                            | 0.60                                                  |
| <i>VPS29</i>     | Vacuolar protein sorting-associated protein 29  | 0.8                                        | 1.5                                            | 0.53                                                  |
| <i>VPS26</i>     | Carboxypeptidase Y-deficient protein 8          | 0.8                                        | 1.4                                            | 0.60                                                  |
| <i>GIS2</i>      | Zinc finger protein Gis2                        | 0.5                                        | 1.2                                            | 0.68                                                  |
| <i>ILV3</i>      | Dihydroxy-acid dehydratase, mitochondrial       | 0.5                                        | 1.0                                            | 0.45                                                  |

1091

1092

1093



| <b>Table 2a. List of yeast strains</b> |                                                                                                       |                                                            |
|----------------------------------------|-------------------------------------------------------------------------------------------------------|------------------------------------------------------------|
| <b>Strain</b>                          | <b>Genotype</b>                                                                                       | <b>Source</b>                                              |
| <b>BJ3505</b>                          | <i>MATa pep4::HIS3 prb1-Δ1.6R lys2-208 trp1-Δ101 ura3-52 gal2 can1</i>                                | <i>Jones et al., 1982</i>                                  |
| <b>SEY6210</b>                         | <i>MATa leu2-3,112 ura3-52 his3-Δ200 trp1-Δ901 suc2-Δ9 lys2-801, GAL</i>                              | <i>Robinson et al., 1988</i>                               |
| <b>SEY6211</b>                         | <i>MATa leu2-3,112 ura3-52 his3-Δ200 trp1-Δ901 ade2-101 suc2-Δ9, GAL</i>                              | <i>Robinson et al., 1988</i>                               |
| <b>TC14</b>                            | <i>BJ3505 ATG18-Gly<sub>6</sub>-FLAG<sub>3</sub>::kanMX4, promNOP1-CAN1::URA3, arg4::natNT2</i>       | <i>This study Fig. 1a-b</i>                                |
| <b>TC22</b>                            | <i>BJ3505 promNOP1-CAN1::URA3, arg4Δ::natNT2</i>                                                      | <i>This study Fig. 1a-b</i>                                |
| <b>AM3739</b>                          | <i>SEY6210 atg18Δ::natNT2, atg21Δ::kanMX4::loxed, hsv2Δ::kanMX4::loxed</i>                            | <i>This study Fig. 1c, Fig. 3f-g &amp; Supp. Fig. 3a-b</i> |
| <b>AM3740</b>                          | <i>SEY6210 atg18Δ::natNT2, atg21Δ::kanMX4::loxed, hsv2Δ::kanMX4::loxed, Vps5-yomCherry::kanMX4</i>    | <i>This study Fig. 1c</i>                                  |
| <b>AM3741</b>                          | <i>SEY6210 atg18Δ::natNT2, atg21Δ::kanMX4::loxed, hsv2Δ::kanMX4::loxed, Vps17-yomCherry::kanMX4</i>   | <i>This study Fig. 1c</i>                                  |
| <b>AM3743</b>                          | <i>SEY6210 atg18Δ::natNT2, atg21Δ::kanMX4::loxed, hsv2Δ::kanMX4::loxed, Vps26-yomCherry::kanMX4</i>   | <i>This study Fig. 1c, Fig. 3f-g &amp; Supp. Fig. 3a-b</i> |
| <b>AM3745</b>                          | <i>SEY6210 atg18Δ::natNT2, atg21Δ::kanMX4::loxed, hsv2Δ::kanMX4::loxed Vps29-yomCherry::kanMX4</i>    | <i>This study Fig. 1c</i>                                  |
| <b>AM3746</b>                          | <i>SEY6210 atg18Δ::natNT2, atg21Δ::kanMX4::loxed, hsv2Δ::kanMX4::loxed Vps35-yomCherry::kanMX4</i>    | <i>This study Fig. 1c</i>                                  |
| <b>TC184</b>                           | <i>SEY6210 WT, plasmid pRS316-ATG18-HyG::URA3</i>                                                     | <i>This study Fig. 1e &amp; Fig. 2d</i>                    |
| <b>TC185</b>                           | <i>SEY6210 Vps35-yomCherry::SpHIS5, plasmid pRS316-ATG18-HyG::URA3</i>                                | <i>This study Fig. 1e</i>                                  |
| <b>TC186</b>                           | <i>SEY6210 Vps35-yomCherry::SpHIS5, vps26Δ::natNT2, plasmid pRS316-ATG18-HyG::URA3</i>                | <i>This study Fig. 1e</i>                                  |
| <b>AM3743</b>                          | <i>SEY6210 atg18Δ:: natNT2, atg21Δ::kanMX4::loxed , hsv2Δ::kanMX4::loxed, Vps26-yomCherry::kanMX4</i> | <i>This study Fig. 1d &amp; Fig. 3f-g</i>                  |
| <b>TC48</b>                            | <i>SEY6210, ATG18-yeGFP::CaURA3</i>                                                                   | <i>This study Fig2 a. &amp; Supp Fig 2a.</i>               |
| <b>TC102</b>                           | <i>SEY6210, ATG18-yeGFP::CaURA3 vps5Δ::natNT2</i>                                                     | <i>This study Fig2 a. &amp; Supp Fig 2a.</i>               |
| <b>TC103</b>                           | <i>SEY6210, ATG18-yeGFP::CaURA3 vps17Δ::natNT2</i>                                                    | <i>This study Fig2 a. &amp; Supp Fig 2a.</i>               |
| <b>TC104</b>                           | <i>SEY6210, ATG18-yeGFP::CaURA3 vps26Δ::natNT2</i>                                                    | <i>This study Fig2 a. &amp; Supp Fig 2a.</i>               |
| <b>TC105</b>                           | <i>SEY6210, ATG18-yeGFP::CaURA3 vps29Δ::natNT2</i>                                                    | <i>This study Fig2 a. &amp;</i>                            |

|                |                                                                                                                                         |                                              |
|----------------|-----------------------------------------------------------------------------------------------------------------------------------------|----------------------------------------------|
|                |                                                                                                                                         | <i>Supp Fig 2a.</i>                          |
| <b>TC106</b>   | <i>SEY6210, ATG18-yeGFP::CaURA3 vps35Δ::natNT2</i>                                                                                      | <i>This study Fig2 a. &amp; Supp Fig 2a.</i> |
| <b>TC97</b>    | <i>SEY6210 atg18Δ::natNT2, atg21Δ::kanMX4::loxed</i>                                                                                    | <i>This study Fig. 2b &amp; Fig. 3c-d</i>    |
| <b>AM3863</b>  | <i>SEY6210 vps26Δ::natNT2</i>                                                                                                           | <i>This study Fig. 2b</i>                    |
| <b>AM4134</b>  | <i>SEY6211 vps17Δ::natNT2</i>                                                                                                           | <i>This study Fig. 2b</i>                    |
| <b>TC232</b>   | <i>SEY6210 vps26Δ::natNT2, vps17Δ::kanMX4</i>                                                                                           | <i>This study Fig. 2b</i>                    |
| <b>AM4201</b>  | <i>SEY6210 atg18Δ::natNT2, atg21Δ::kanMX4::loxed, vps17Δ::kanMX4</i>                                                                    | <i>This study Fig. 2b &amp; Fig. 3e/h</i>    |
| <b>AM3774</b>  | <i>SEY6210 VPS26-yomCherry::SpHIS5</i>                                                                                                  | <i>This study Fig. 2d</i>                    |
| <b>AM4135</b>  | <i>SEY6211 vps17Δ::natNT2, VPS26-yomCherry::SpHIS5</i>                                                                                  | <i>This study Fig. 2d</i>                    |
| <b>CUY9932</b> | <i>CUY100, promVPS26::HIS3-promGAL1, promVPS29::natNT2-promGAL1::VPS29-GFP::kanMX4, promVPS35::hphNT1, VPS26::TAP-URA3, vps5Δ::TRP1</i> | <i>Purushothaman et al., 2017</i>            |

1094

1095

1096

1097

1098

| <b>Table 2b. List of mammalian cell lines</b> |                                    |                                       |
|-----------------------------------------------|------------------------------------|---------------------------------------|
| <b>MGDL</b>                                   | HK-2 (ATCC® CRL-2190™)             | <i>Fig. 5, Supp. Fig. 5 &amp; 6</i>   |
| <b>MGDL</b>                                   | HK-2 , <i>wipi1</i> <sup>-/-</sup> | <i>This study Fig. 5 Supp. Fig. 5</i> |

1099

| <b>Table 3. List of plasmids</b> |                                                                             |                                                                                                |
|----------------------------------|-----------------------------------------------------------------------------|------------------------------------------------------------------------------------------------|
| <b>Plasmids</b>                  | <b>description</b>                                                          | <b>Source</b>                                                                                  |
| <b>A2096</b>                     | <i>pRS406-promNOP1::CaURA3</i>                                              | <i>This study</i>                                                                              |
| <b>pTC35</b>                     | <i>pRS316-promATG18-codATG18<sup>WT</sup>-HA<sub>3</sub>yeGFP::CaURA3</i>   | <i>This study. Substitution of GFP to yeGFP using template from Obara et al., 2008,</i>        |
| <b>pNG76</b>                     | <i>pRS316-promATG18-codATG18<sup>FGGG</sup>-HA<sub>3</sub>GFP::CaURA3</i>   | <i>Gopaldass et al., 2017</i>                                                                  |
| <b>pTC90</b>                     | <i>pRS316-promATG18-codATG18<sup>S55A</sup>-HA<sub>3</sub>yeGFP::CaURA3</i> | <i>This study Supp Fig. 3</i>                                                                  |
| <b>pTC91</b>                     | <i>pRS316-promATG18-codATG18<sup>S55E</sup>-HA<sub>3</sub>yeGFP::CaURA3</i> | <i>This study Supp Fig. 3</i>                                                                  |
| <b>pTC95</b>                     | <i>pRS316-promATG18-codATG18<sup>T56A</sup>-HA<sub>3</sub>yeGFP::CaURA3</i> | <i>This study Supp Fig. 3</i>                                                                  |
| <b>pTC96</b>                     | <i>pRS316-promATG18-codATG18<sup>T56E</sup>-HA<sub>3</sub>yeGFP::CaURA3</i> | <i>This study Fig. 3 &amp; Supp. Fig 3</i>                                                     |
| <b>pTC97</b>                     | <i>pRS316-promATG18-codATG18<sup>S57A</sup>-HA<sub>3</sub>yeGFP::CaURA3</i> | <i>This study Supp Fig. 3</i>                                                                  |
| <b>pTC98</b>                     | <i>pRS316-promATG18-codATG18<sup>S57E</sup>-HA<sub>3</sub>yeGFP::CaURA3</i> | <i>This study Supp Fig. 3</i>                                                                  |
| <b>pNG65</b>                     | <i>pEXP5-NT/TOPO (Invitrogen) – codATG18<sup>WT</sup></i>                   | <i>This study Fig. 4</i>                                                                       |
| <b>pTC109</b>                    | <i>pEXP5-NT/TOPO (Invitrogen) – codATG18<sup>FGGG</sup></i>                 | <i>This study Fig. 4</i>                                                                       |
| <b>pTC110</b>                    | <i>pEXP5-NT/TOPO (Invitrogen) – codATG18<sup>T56E</sup></i>                 | <i>This study Fig. 4</i>                                                                       |
| <b>pMGDL53</b>                   | <i>pAR31CD-mCherry-WIPI1 WT</i>                                             | <i>This study Fig. 5&amp; Supp. Fig. 5</i>                                                     |
| <b>pMGDL4</b>                    | <i>pAR31CD-EGFP-WIPI1 WT</i>                                                | <i>from Tassula Proikas-Cezanne, Tübingen, Germany<br/>This study Fig. 5&amp; Supp. Fig. 5</i> |
| <b>pMGDL37</b>                   | <i>pAR31CD-mCherry-WIPI1 S69A</i>                                           | <i>This study Fig. 5&amp; Supp. Fig. 5</i>                                                     |
| <b>pMGDL38</b>                   | <i>pAR31CD-EGFP-WIPI1 S69A</i>                                              | <i>This study Fig. 5&amp; Supp. Fig. 5</i>                                                     |
| <b>pMGDL35</b>                   | <i>pAR31CD-mCherry-WIPI1 S69E</i>                                           | <i>This study Fig. 5&amp; Supp. Fig. 5</i>                                                     |
| <b>pMGDL36</b>                   | <i>pAR31CD-EGFP-WIPI1 S69E</i>                                              | <i>This study Fig. 5&amp; Supp. Fig. 5</i>                                                     |
| <b>Addgene 49201</b>             | <i>pAC-mCherry-RAB5</i>                                                     | <i>This study Fig. 5</i>                                                                       |
| <b>pMGDL55</b>                   | <i>pcDNA3-EGFP-VPS26</i>                                                    | <i>This study Fig. 5</i>                                                                       |
| <b>pMGDL52</b>                   | <i>EGFP-VPS35</i>                                                           | <i>from Pete J Cullen, Bristol, UK.</i>                                                        |

|  |  |                                |
|--|--|--------------------------------|
|  |  | <i>This study Supp. Fig. 5</i> |
|--|--|--------------------------------|

1100

| <b>Table 4. List of primers and double-stranded DNA</b> |                                                                                                       |
|---------------------------------------------------------|-------------------------------------------------------------------------------------------------------|
| <b>Primers</b>                                          | <b>Sequence 5' -&gt; 3'</b>                                                                           |
| CAN1 cloning Fw                                         | TAA GCA GGA TCC ATG ACA AAT TCA AAA GAA GAC GCC GAC                                                   |
| CAN1 cloning Rv                                         | TGC TTA CTC GAG CTA TGC TAC AAC ATT CCA AAA TTT GTC CCA AAA                                           |
| pNOP1 CHK Fw                                            | ATT GAG TCA TCA GCC TCT TC                                                                            |
| CAN1 CHK Rv                                             | TCC TCT ATG TCG GCG TCT TC                                                                            |
| arg4 KO Fw                                              | GAA GAG CTC AAA AGC AGG TAA CTA TAT AAC AAG ACT AAG GCA AAC<br>CAG CTG AAG CTT CGT ACG C              |
| arg4 KO Rv                                              | AAG TAC CAG ACC TGA TGA AAT TCT TGC GCA TAA CGT CGC CAT CTG<br>GCA TAG GCC ACT AGT GGA TCT G          |
| SphI-yeGFP-NotI Fw                                      | ATA CAT GCAT GCAT GTC TAA AGG TGA AGA ATT ATT CAC TGG TGT TG                                          |
| SphI-yeGFP-NotI Rv                                      | ATA AGA ATG CGG CCG CTT ATT TGT ACA ATT CAT CCA TAC CAT GGG<br>TAA TAC CA                             |
| atg18 KO Fw                                             | CAG TTA ACT CTG TAT CCT TTT CTT CTT CGG CCT GAC AAT GCG TAC<br>GCT GCA GGT CGA C                      |
| atg18 KO Rv                                             | TGT GAC GTA CGG AAG GCA GCG CGA GAC ACT TCC GTG ATC AAT<br>CGA TGA ATT CGA GCT CG                     |
| atg21 KO Fw                                             | ACT CCT TTG GAT TTG AAA TAG ACA GAT AGA AAA GGA TAT GCG TAC<br>GCT GCA GGT CGA C                      |
| atg21 KO Rv                                             | CAA TAT CTA TTA AGA TTA TGA AAA CTG CAC ATA TGC ATT AAT CGA<br>TGA ATT CGA GCT CG                     |
| hsv2 KO Fw                                              | CTG GAA AGG CAG CGA TTA TTA GAG GAC AAC TAT AAG CAT ACA TAA<br>CTA GCA GAT GCG TAC GCT GCA GGT CGA C  |
| hsv2 KO Rv                                              | TTG TAC GTA AAT GCA CAC TTT CTC TAT ACA TAT ATA TAT ATT TAT<br>ATT CAT GTT AAT CGA TGA ATT CGA GCT CG |
| ATG18-Cterm FLAG Fw                                     | GGC GGC GAT TGC TTA ATA TTG TCA CAG TAT TCC ATC TTG ATG GAT<br>GGG GGA GGC GGG GGT GGA                |
| ATG18-Cterm FLAG Rv                                     | GTA TGC GTT GTG ACG TAC GGA AGG CAG CGC GAG ACA CTT CCG<br>TGA GAA TTC GAG CTC GTT TAA AC             |
| VPS5 Cterm pKT Fw                                       | ATG CAT CGA GCT TTG GGA GAC ATT CTA CCA AAC CAA TCT TGG TGA<br>CGG TGC TGG TTT A                      |
| VPS5 Cterm pKT Rv                                       | AGG AAC GTG ACA CAT AAA GTT ATT GTA TAC AGA TCA TCT ATC GAT<br>GAA TTC GAG CTC G                      |
| VPS17 Cterm pKT Fw                                      | ACT GAA TGC GCG CCA TGC TGC TTC ACT TTT GGG CAT GTC CAC TAA<br>AGG TGA CGG TGC TGG TTT A              |
| VPS17 Cterm pKT Rv                                      | GAT CAC CTT GTT CAA AGG TAT GAA TTT TCT ACT TTA TAT ACG TAT<br>CGA TGA ATT CGA GCT CG                 |

|                             |                                                                                                                                                                                                                                                      |
|-----------------------------|------------------------------------------------------------------------------------------------------------------------------------------------------------------------------------------------------------------------------------------------------|
| VPS26 Cterm pKT Fw          | ATA TTT TAA ACA ATC AGA AAT AAC ATT GTA CAG GAC CCG GGG TGA<br>CGG TGC TGG TTT A                                                                                                                                                                     |
| VPS26 Cterm pKT Rv          | AGA ACC ACA TCT TCA CCT TAT TTA AGG TCG AGC TTT TCT ATC GAT<br>GAA TTC GAG CTC G                                                                                                                                                                     |
| VPS29 Cterm pKT Fw          | TGG AGA AGT GAA GGT CGA TAA AGT GGT TTA TGA AAA GGA AGG TGA<br>CGG TGC TGG TTT A                                                                                                                                                                     |
| VPS29 Cterm pKT Rv          | GAC ATC ATA GAA ATG CAT AAA AAT GAA AAT GGC TAC CCT ATC GATG<br>AAT TCG AGC TCG                                                                                                                                                                      |
| VPS35 Cterm pKT Fw          | GAA AGT CAA AGA GAA GTT GAC GAT CGT TTC AAA GTC ATA TAT GTA<br>GGT GAC GGT GCT GGT TTA                                                                                                                                                               |
| VPS35 Cterm pKT Rv          | TTT ATC TTG GGC ATG TAC GAA GAG CAA GTA CGT TAT TTA ATC GAT<br>GAA TTC GAG CTC G                                                                                                                                                                     |
| vps5 KO Fw                  | AGG AAC GTG ACA CAT AAA GTT ATT GTA TAC AGA TCA TCT AGC ATA<br>GGC CAC TAG TGG ATC TG                                                                                                                                                                |
| vps5 KO Rv                  | ATT TTA TAA ACT TTC ATA CAT CCT GCA ATA ACA AGC CAT GCA GCT<br>GAA GCT TCG TAC GC                                                                                                                                                                    |
| vps17 KO Fw                 | TTG TTC AAA GGT ATG AAT TTT CTA CTT TAT ATA CGT ATT AGC ATA<br>GGC CAC TAG TGG ATC TG                                                                                                                                                                |
| vps17 KO Rv                 | TAC TGT ACC CTT AGT CAA TCC ATC TAT CCT CTG AAC AAT GCA GCT<br>GAA GCT TCG TAC GC                                                                                                                                                                    |
| vps26 KO Fw                 | AGA ACC ACA TCT TCA CCT TAT TTA AGG TCG AGC TTT TCT AGC ATA<br>GGC CAC TAG TGG ATC TG                                                                                                                                                                |
| vps26 KO Rv                 | ATT GTA AAA GAA TCC AAG CAC AAC TAT TAT TAG CAT TAT GCA GCT<br>GAA GCT TCG TAC GC                                                                                                                                                                    |
| vps29 KO Fw                 | GAC ATC ATA GAA ATG CAT AAA AAT GAA AAT GGC TAC CCT AGC ATA<br>GGC CAC TAG TGG ATC TG                                                                                                                                                                |
| vps29 KO Rv                 | TAG TGG CGA AAA GGT CAT AGA ATT ATT CGC CTA AAT TAT GCA GCT<br>GAA GCT TCG TAC GC                                                                                                                                                                    |
| vps35 KO Fw                 | ATC TTG GGC ATG TAC GAA GAG CAA GTA CGT TAT TTA ACT AGC ATA<br>GGC CAC TAG TGG ATC TG                                                                                                                                                                |
| vps35 KO Rv                 | AAG GAG GAG GAC GAG AAA GAA GAA GCT GAA AAA CAC AAT GCA<br>GCT GAA GCT TCG TAC GC                                                                                                                                                                    |
| atg18 <sup>S55A</sup> Fw    | GTC GAG ATG TTG TTC GCC ACC TCG TTA CTA GCC CTC GTT GGG ATA<br>G                                                                                                                                                                                     |
| atg18 <sup>S55A</sup> Rv    | CTA GTA ACG AGG TGG CGA ACA ACA TCT CGA CGA TAG CAT AGC CCC<br>C                                                                                                                                                                                     |
| atg18 <sup>S55E</sup> dsDNA | GCG ATC GCA ATA TTC AAT TGT GAG CCC TTC GGA AAA TTT TAT TCA<br>GAG GAC AGT GGG GGC TAT GCT ATC GTC GAG ATG TTG TTC GAG<br>ACC TCG TTA CTA GCC CTC GTT GGG ATA GGC GAT CAA CCT GCG CTT<br>TCA CCA AGG AGA TTG CGT ATA ATC AAC ACA AAA AAA CAT TCT ATT |



|                                              |                                                                                                                                                                                                                                                                                                                                                                                                                                                                             |
|----------------------------------------------|-----------------------------------------------------------------------------------------------------------------------------------------------------------------------------------------------------------------------------------------------------------------------------------------------------------------------------------------------------------------------------------------------------------------------------------------------------------------------------|
|                                              | ATC TGT GAG GTG ACT TTC CCT ACT TCT ATT CTG AGT GTG AAA ATG<br>AAT AAG TCT CGA TTG GTG GTA CTT TTA CAA GAG CAG ATT TAT ATT<br>TAT GAT ATC AAC ACC ATG AGA CTA TTG CAT ACT ATA GAA ACA AAC<br>CCT AAC CCA CGT GGC CTT ATG GCT ATG TCT CCT TCG GTA GCC AAC<br>AGC TAT TTA GTG TAT CCA TCA CCA CCA AAA GTT ATT AAC TCC GAA<br>ATT AAA GCT CAT GCC ACC ACA AAC AAT ATC ACA TTG TCA GTT GGT<br>GGC AAC ACA GAG ACC AGT TTC AAG AGA GAT CAG CAA GAT GCT<br>GGC CAT AGT GAG GAT CC |
| <i>atg18<sup>T56A</sup> Fw</i>               | GAG ATG TTG TTC TCC GCC TCG TTA CTA GCC CTC GTT GGG ATA GGC<br>G                                                                                                                                                                                                                                                                                                                                                                                                            |
| <i>atg18<sup>T56A</sup> Rv</i>               | GGG CTA GTA ACG AGG CGG AGA ACA ACA TCT CGA CGA TAG CAT<br>AGC C                                                                                                                                                                                                                                                                                                                                                                                                            |
| <i>atg18<sup>T56E</sup> Fw</i>               | GAG ATG TTG TTC TCC GAA TCG TTA CTA GCC CTC GTT GGG ATA GGC<br>GAT                                                                                                                                                                                                                                                                                                                                                                                                          |
| <i>atg18<sup>T56E</sup> Rv</i>               | GAG GGC TAG TAA CGA TTC GGA GAA CAA CAT CTC GAC GAT AGC ATA<br>GCC                                                                                                                                                                                                                                                                                                                                                                                                          |
| <i>atg18<sup>S57A</sup> Fw</i>               | ATG TTG TTC TCC ACC GCG TTA CTA GCC CTC GTT GGG ATA GGC GAT<br>C                                                                                                                                                                                                                                                                                                                                                                                                            |
| <i>atg18<sup>S57A</sup> Rv</i>               | CGA GGG CTA GTA ACG CGG TGG AGA ACA ACA TCT CGA CGA TAG<br>CAT A                                                                                                                                                                                                                                                                                                                                                                                                            |
| <i>atg18<sup>S57E</sup> Fw</i>               | ATG TTG TTC TCC ACC GAG TTA CTA GCC CTC GTT GGG ATA GGC GAT<br>CA                                                                                                                                                                                                                                                                                                                                                                                                           |
| <i>atg18<sup>S57E</sup> Rv</i>               | ACG AGG GCT AGT AAC TCG GTG GAG AAC AAC ATC TCG ACG ATA GCA<br>TA                                                                                                                                                                                                                                                                                                                                                                                                           |
| <i>wipi1 S69A Fw</i>                         | CGC CTC TTC TCC GTC AGC CTG GTG GTG                                                                                                                                                                                                                                                                                                                                                                                                                                         |
| <i>wipi1 S69A Rv</i>                         | CAC CAC CAG GCT GAC GGA GAA GAG GCG                                                                                                                                                                                                                                                                                                                                                                                                                                         |
| <i>wipi1 S69E Fw</i>                         | CGC CTC TTC TCC GAG AGC CTG GTG GTG                                                                                                                                                                                                                                                                                                                                                                                                                                         |
| <i>wipi1 S69E Rv</i>                         | CAC CAC CAG GCT CTC GGA GAA GAG GCG                                                                                                                                                                                                                                                                                                                                                                                                                                         |
| <i>wipi1 CRISPR Fw</i>                       | CAC CGC TTG AAG ATG TGT ACC GTC T                                                                                                                                                                                                                                                                                                                                                                                                                                           |
| <i>wipi1 CRISPR Rv</i>                       | AAA CAG ACG GTA CAC ATC TTC AAG C                                                                                                                                                                                                                                                                                                                                                                                                                                           |
| <i>siRNA vps35 Fw</i>                        | CTG GAC ATA TTT ATC AAT ATA                                                                                                                                                                                                                                                                                                                                                                                                                                                 |
| <i>siRNA vps35 Rv</i>                        | TAT ATT GAT AAA TAT GTC CAG                                                                                                                                                                                                                                                                                                                                                                                                                                                 |
| <i>mCherry-WIPI1 Age1-<br/>mcherry Fw</i>    | CTA CCG GTC GCC ACC ATG GTG AGC AAG GGC GAG GAG G                                                                                                                                                                                                                                                                                                                                                                                                                           |
| <i>mCherry-WIPI1<br/>Age1-mcherry Rv</i>     | GCT CGA GAT CTG AGT CCG GAC TTG TAC AGC TCG TCC ATG CCG                                                                                                                                                                                                                                                                                                                                                                                                                     |
| <i>mCherry-WIPI1<br/>EGFP-WIPI1-EcoR1 Fw</i> | TCC GGA CTC AGA TCT CGA GCT ATG GAG GCC GAG GCC GCG                                                                                                                                                                                                                                                                                                                                                                                                                         |
| <i>mCherry-WIPI1</i>                         | CAG AAT TCT CAT GAC TGC TTC GTT TTG CCC TTC TG                                                                                                                                                                                                                                                                                                                                                                                                                              |

|                            |                                                                                                    |
|----------------------------|----------------------------------------------------------------------------------------------------|
| <i>EGFP-WIPI1-EcoR1 Rv</i> |                                                                                                    |
| <i>hVPS26 Fw</i>           | <i>GGG AGA CCC AAG CTT GGT ACC GAG CTC GGA TCC ACT AGT AAT<br/>GAG TTT TCT TGG AGG CTT TTT TGG</i> |
| <i>hVPS26 Rv</i>           | <i>CTC GAG CGG CCG CCA GTG TGA TGG ATA TCT GCA GAA TTC TCT ATG<br/>ATG ATG ATG ATG GGA TCC AC</i>  |

1101

1102

1103 **Figure legends:**

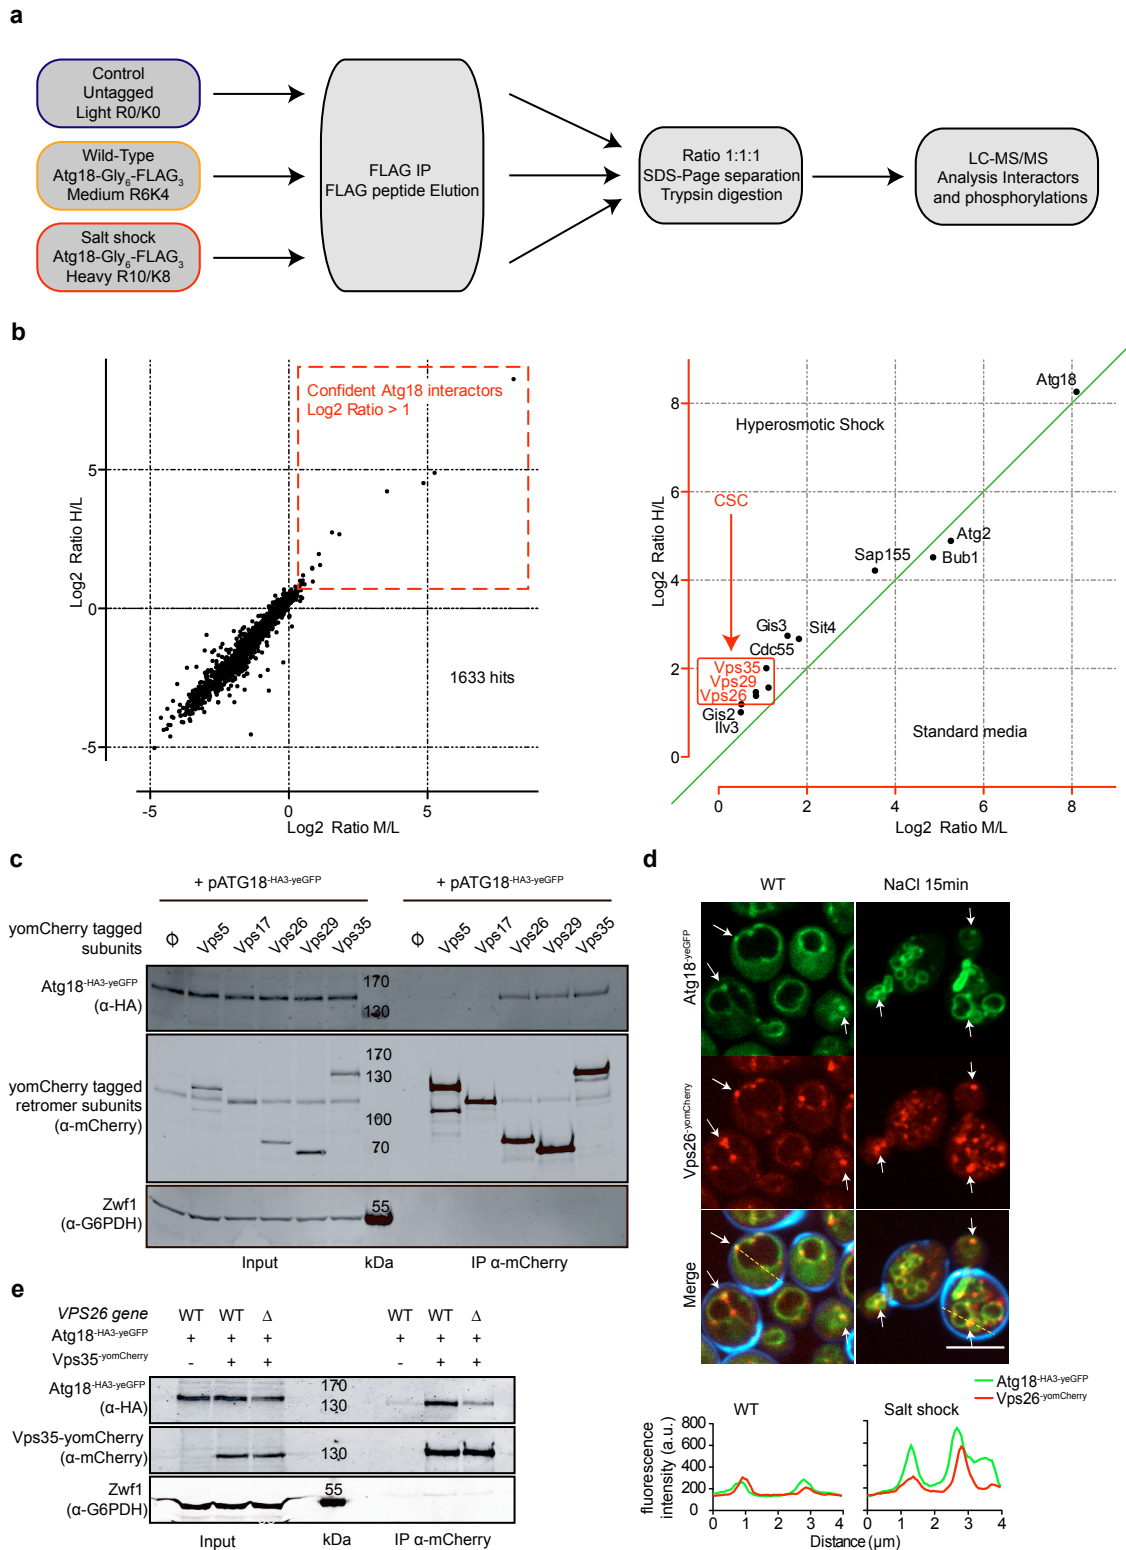

1104

1105 **Figure 1: Atg18 interacts with Vps26, Vps29 and Vps35**

1106 **a**, Procedure of the Triplex SILAC approach. **b**, Scatter plot of the log<sub>2</sub> distribution of  
1107 Atg18 partners identified by SILAC mass spectrometry. The abscissa shows log<sub>2</sub>  
1108 ratios of peptides found in standard media relative to the non-tagged negative control  
1109 (medium/light; M/L). The ordinate shows log<sub>2</sub> ratios of peptides found in salt shocked  
1110 cells, relative to the non-tagged negative control (heavy/light; H/L). **c**, Interaction of  
1111 Atg18 with retromer subunits. Genomically tagged yomCherry-fusions of each  
1112 retromer subunit were expressed in *SEY6210 atg18Δ*, *atg21Δ*, *hsv2Δ* cells, together  
1113 with a plasmid expressing Atg18<sup>HA3yeGFP</sup>. Cell lysates were subjected to  
1114 immunoprecipitation using RFP-Trap magnetic beads and analyzed by SDS-PAGE  
1115 and Western blotting against the indicated proteins. **d**, Salt-induced vacuole  
1116 fragmentation. Live cell confocal imaging of Atg18<sup>HA3-yeGFP</sup> and Vps26<sup>yomCherry</sup> before  
1117 and after a mild salt shock with 0.5 M NaCl for 15 minutes. Calcofluor white used to  
1118 stain the cell walls is only shown in the merge. Scale bar: 5 μm. A line scan along the  
1119 dashed yellow line shown in d. **e**, Requirement of Vps26 for the Atg18-Vps35  
1120 interaction. Genomically tagged Vps35<sup>yomCherry</sup> was pulled down from lysates of  
1121 *SEY6210 WT* or *SEY6210 vps26Δ* strains. Adsorbed proteins were analyzed by  
1122 SDS-PAGE and Western blotting using the antibodies indicated in brackets.  
1123

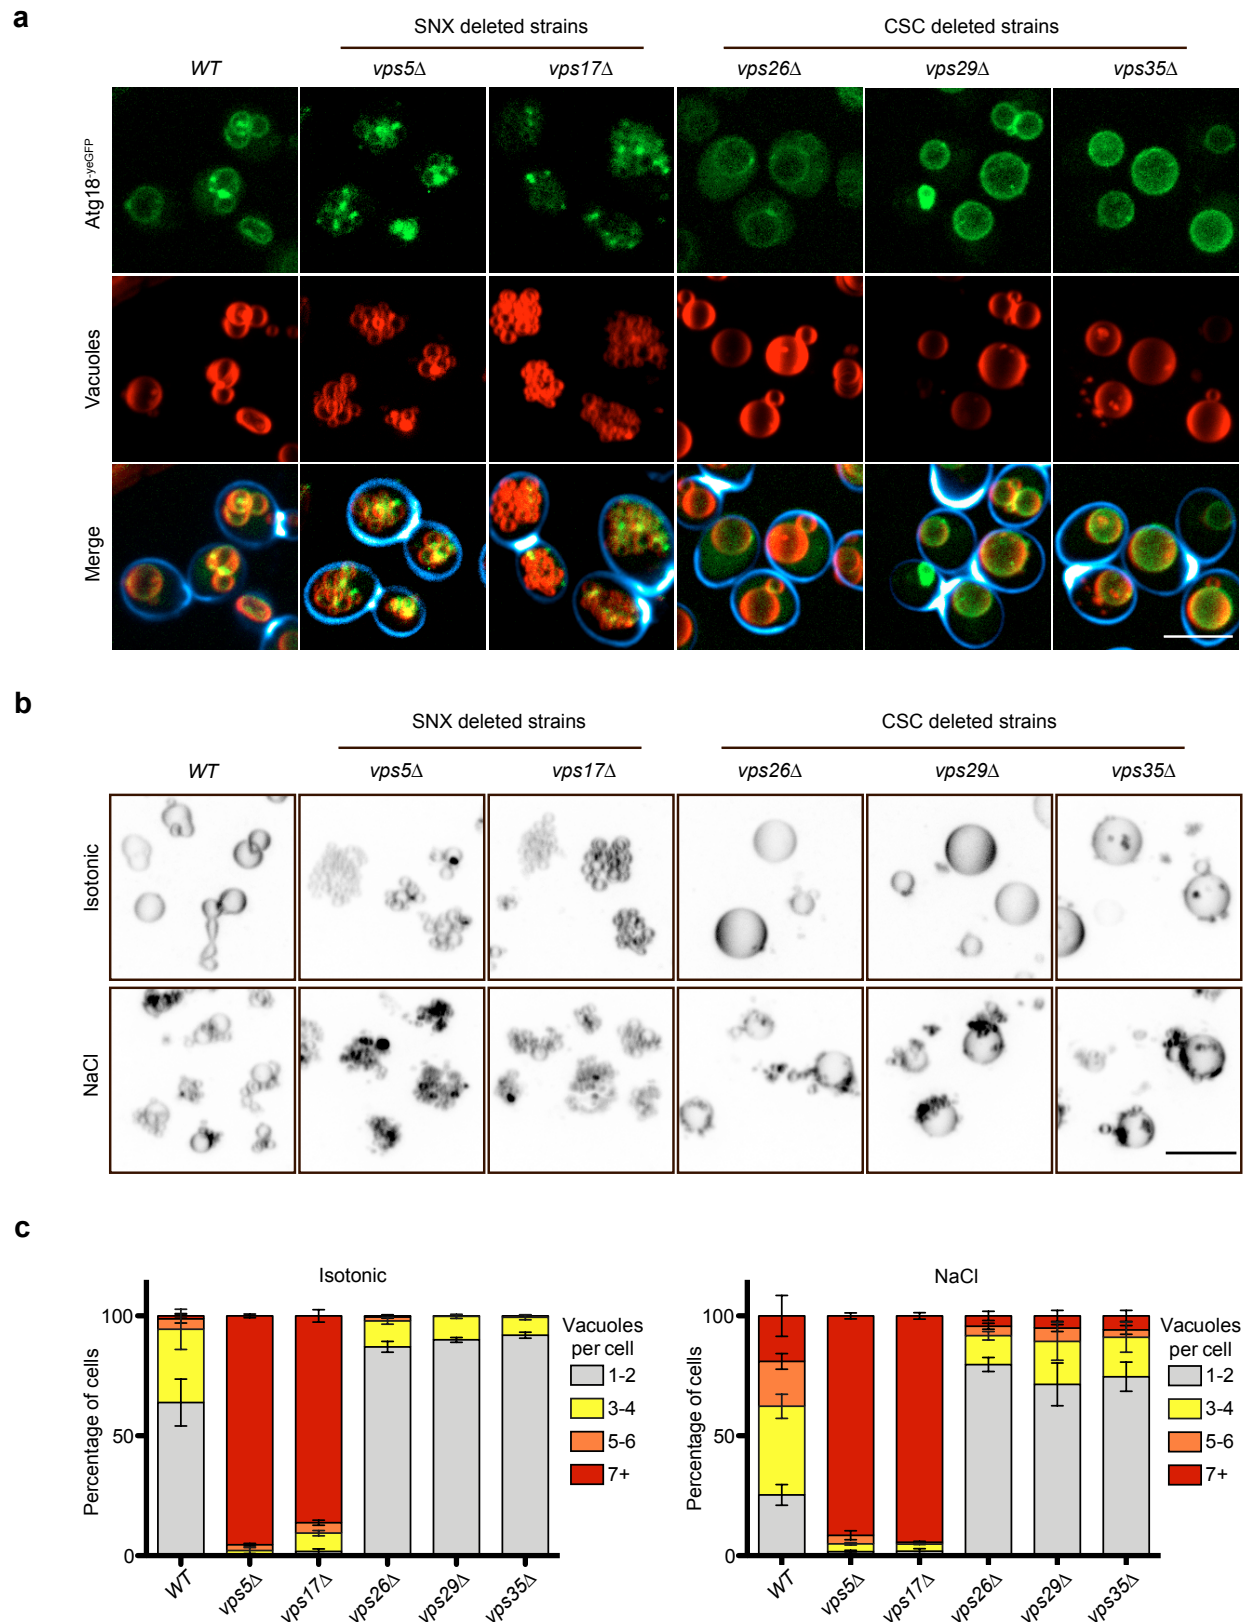

1124

1125 **Figure 2: Effects of sorting nexins and CSC subunits on vacuole structure and**

1126 **vacuole fission *in vivo***

1127 **a**, Vacuole structure. Cells carrying Atg18<sup>yeGFP</sup> and the indicated retromer deletions  
1128 were logarithmically grown in YPD medium, stained with FM4-64 and calcofluor  
1129 white, and analyzed by confocal microscopy. Maximum intensity projections of z-  
1130 stacks are shown. Scale bar: 5  $\mu$ m. **b**. Salt-induced vacuole fission. The indicated  
1131 cells were logarithmically grown in YPD and stained with FM4-64. Vacuole  
1132 morphology was imaged as in a, before and after a mild salt shock with 0.5 M of  
1133 NaCl for 15 min. The look-up table has been inverted to allow better representation of  
1134 the clusters of extremely small vacuolar fragments in the SNX mutants. Scale bar: 5  
1135  $\mu$ m. **c**. The number of vacuoles per cell was quantified for the samples from b. n=3  
1136 experiments with at least 100 cells per condition were evaluated; Error bars  
1137 represent the SEM.  
1138  
1139



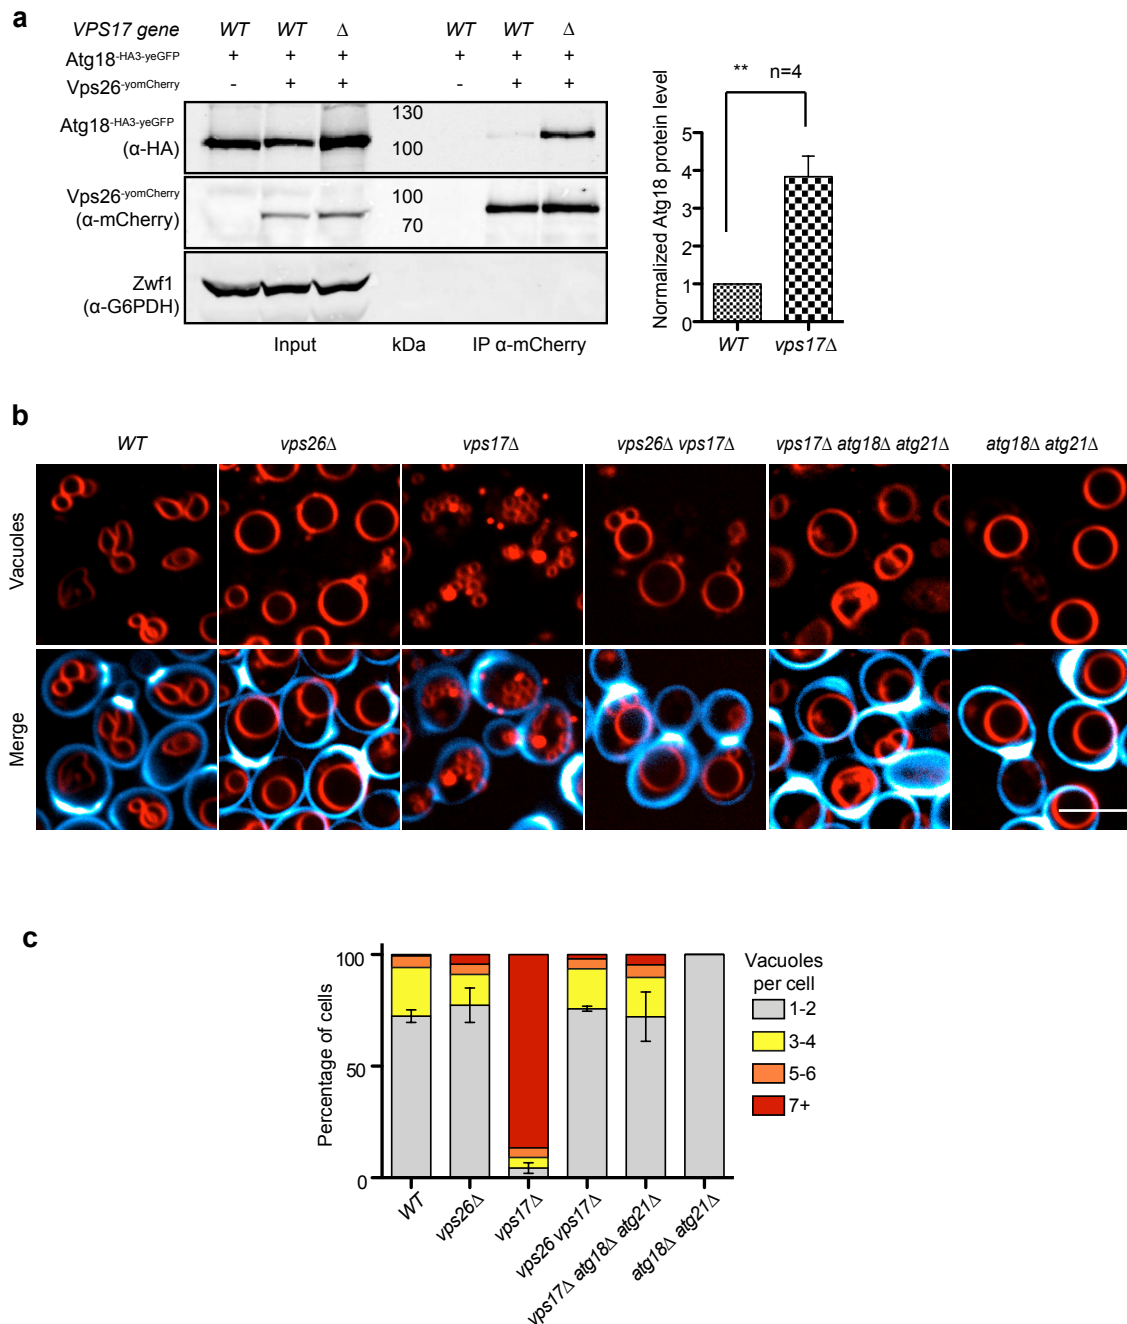

1140

1141 **Fig. 3. Interaction of Atg18 and CSC**

1142 **a**, Vps17 labilizes the Atg18-Vps26 interaction. Wildtype or *vps17*Δ cells expressing  
 1143 ATG18<sup>HA3-yeGFP</sup> from a centromeric plasmid were logarithmically grown in YPD.  
 1144 Genomically tagged Vps26<sup>YomCherry</sup> was pulled down from whole-cell extracts and  
 1145 analyzed for associated Atg18<sup>HA3-yeGFP</sup> by SDS-PAGE and Western blotting.  
 1146 Glucose-6-phosphate dehydrogenase (Zwf1) serves as a loading control. The  
 1147 intensity of the interacting Atg18<sup>HA3-yeGFP</sup> was quantified on a LICOR fluorescence

1148 imager and normalized to the amount of Vps26<sup>YomCherry</sup>. Means from n=4 independent  
1149 experiments are shown; error bars represent the SEM. Values of the wildtype  
1150 interaction were used as the reference and set to 1. \*\*p<0.01 **b**, Epistasis of ATG18  
1151 and retromer genes concerning vacuolar morphology. The indicated cells were  
1152 logarithmically grown in YPD medium, stained with FM4-64 and calcofluor white as in  
1153 Fig. 2a and analyzed by confocal microscopy. Scale bar: 5  $\mu$ m. **c**, Quantification of  
1154 vacuole morphology. The number of vacuoles per cell was measured in the cells  
1155 from b. The graph shows the fractions of cells displaying the indicated numbers of  
1156 vacuolar vesicles. n=3 experiments with at least 100 cells per condition and  
1157 experiment were analysed. Error bars represent the SEM.  
1158

1159

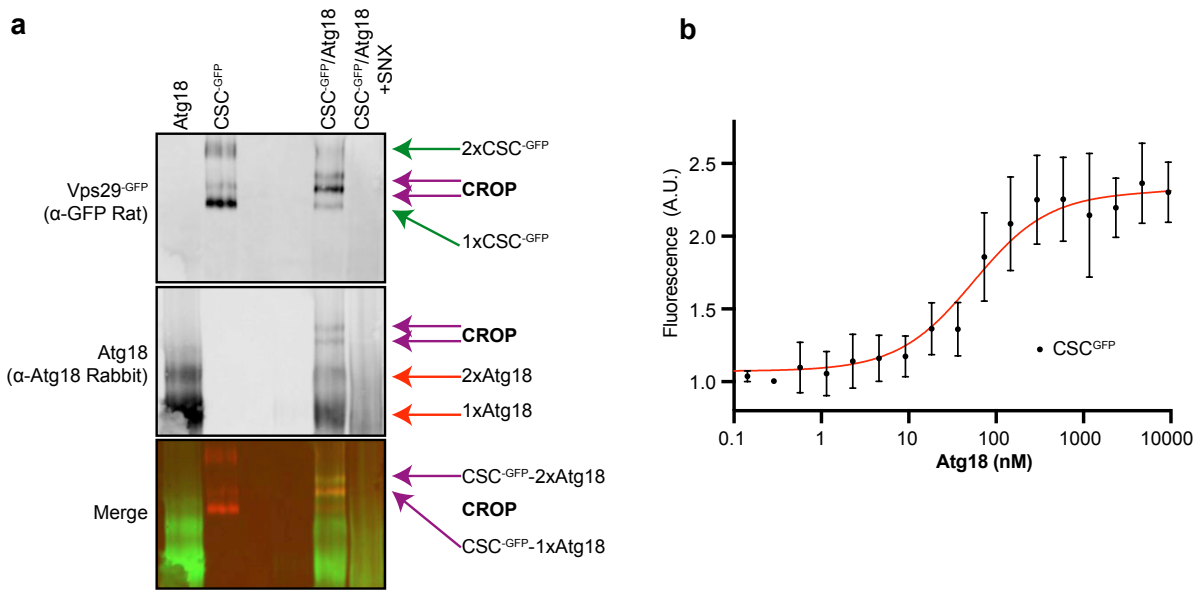

1160

1161 **Figure 4: Formation of CROP from pure components and interference by SNX.**

1162 **a**, Purified Atg18 and CSC<sup>GFP</sup> were mixed in a 1:1 ratio, in the presence or absence  
1163 of a 5-fold excess of SNX. The proteins were incubated together in PBS and  
1164 analyzed by native PAGE and Western blotting using the antibodies indicated in  
1165 brackets. **b**, Pure recombinant Atg18 was titrated from 0 to 75 μM using the shift of  
1166 fluorescence of Vps29<sup>GFP</sup> (2.5 nM), which is induced by Atg18 binding. The curve  
1167 was fitted using GraphPad Prism 9.

1168

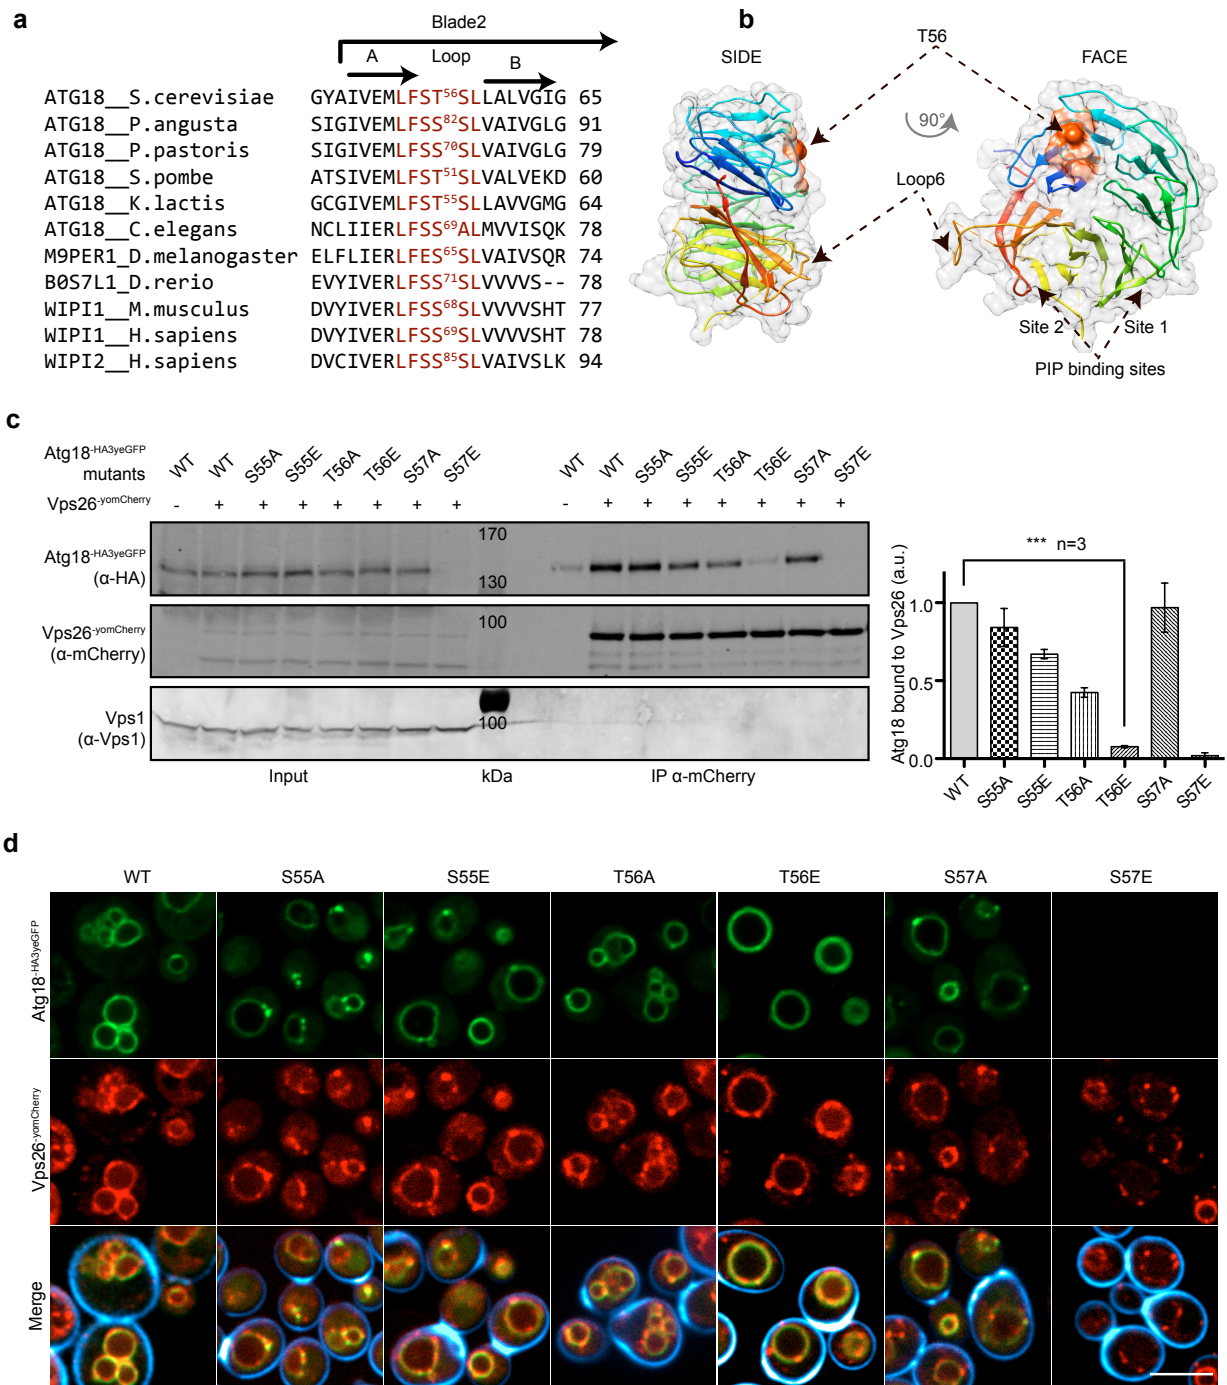

1169

1170

### Figure 5: Substitutions labilizing the Atg18-Vps26 interaction

1171

**a**, Sequence alignment of various Atg18 and WIPI1/2 orthologs showing a conserved

1172

stretch (in red) of residues in blade 2. **b**, The stretch containing T56 is mapped on the

1173

structure of Atg18 from *S. cerevisiae* (pdb #6KYB) (Lei *et al*, 2020), the LFSTSL motif

1174

in from *S. cerevisiae* is shown in orange, Thr56 in red. **c**, Pull-down. Cells (*SEY6210*

1175

*atg18Δ*, *atg21Δ*) expressing genomically tagged Vps26<sup>yomCherry</sup> and the indicated

1176

Atg18<sup>HA3-yeGFP</sup> variants were logarithmically grown in SC-URA media. Vps26<sup>yomCherry</sup>

1177

was pulled down from whole-cell extracts with RFP-trap magnetic beads and

1178 analyzed by SDS-PAGE and Western blotting against the indicated proteins. Bands  
1179 were quantified on a LICOR fluorescence imager. Signals of Atg18<sup>HA3yeGFP</sup> were  
1180 normalized relative to those of Vps26<sup>yomCherry</sup>. Vps1 served as a loading control. n=3  
1181 independent experiments were averaged. Error bars represent the SEM. \*\*\* p<0.001.  
1182 **d**, Influence of the Atg18 substitutions on its localization. The cells from c were  
1183 stained with calcofluor white to mark the cell walls and analyzed by confocal  
1184 microscopy. The calcofluor signal (blue) is only shown in the merge. Scale bar: 5  $\mu$ m.  
1185

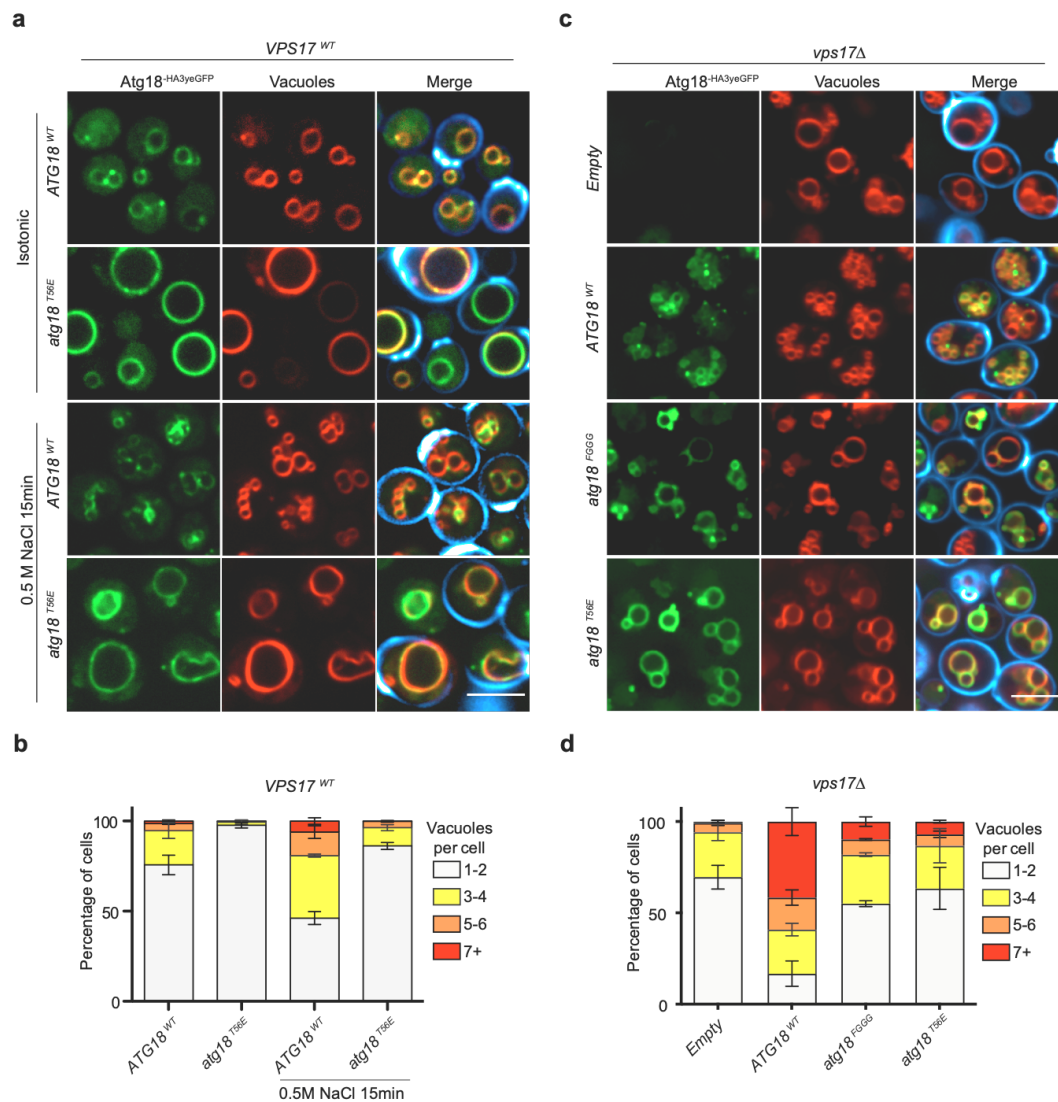

1186

1187 **Figure 6: The Atg18-CSC interaction in CROP is essential for vacuole fission.**

1188 **a**, Effect of Atg18<sup>T56E</sup> on salt-induced vacuole fission.. Cells expressing Atg18<sup>WT</sup>HA3-

1189 yeGFP or Atg18<sup>T56E</sup>-HA3-yeGFP from centromeric plasmids in a *SEY6210 atg18Δ, atg21Δ*

1190 strain were logarithmically grown in SD<sup>-URA</sup> medium. They were stained and imaged

1191 before and after the induction of vacuole fission by a short salt shock as in Fig. 1d.

1192 Calcofluor white-stained cell walls are only represented in the merge (blue). Scale

1193 bar: 5 μm. **b**, Quantification of the number of vacuoles per cell from a, n=3

1194 experiments with at least 100 cells per condition were scored; error bars represent

1195 the SEM. **c**, Epistasis of *atg18<sup>T56E</sup>* over a *vps17Δ* mutation. The indicated variants of

1196 Atg18-HA3-yeGFP were expressed from plasmids in a *SEY6210 atg18Δ, atg21Δ,*

1197 *vps17Δ* strain. Cells were logarithmically grown in SD-URA and imaged as in Fig. 1d.

1198 Scale bar: 5 μm. **d**, Quantification of the experiments from c.



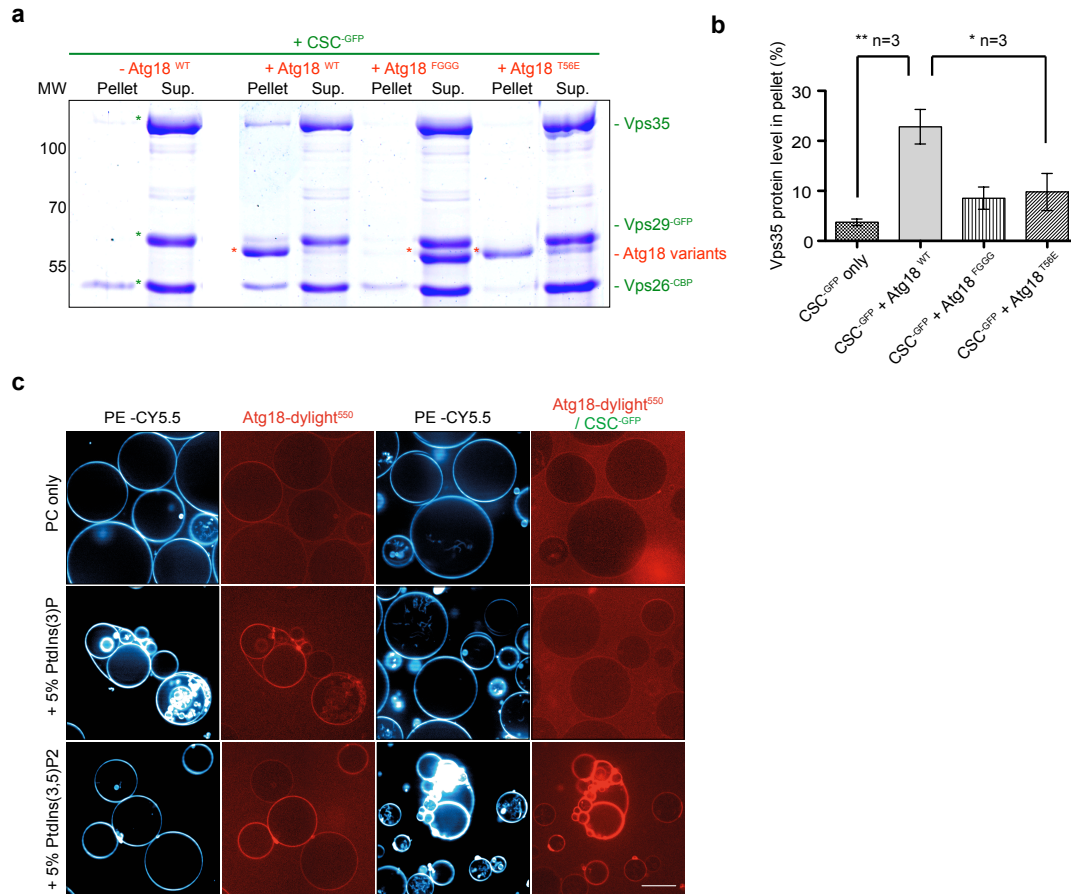

1199

1200 **Figure 7: Impact of phosphoinositides on CROP binding**

1201 **a**, Atg18-dependent recruitment of CSC-GFP to small liposomes. SUVs were  
 1202 incubated (10 min, 25°C) with purified CSC (1.5 μM) alone or in combination with the  
 1203 indicated recombinant Atg18 variants (1.5 μM). The vesicles were sedimented by  
 1204 centrifugation and supernatants (Sup.) and pellets were analyzed by SDS-PAGE  
 1205 and Coomassie staining. **b**, Quantification by densitometry of the Coomassie signals  
 1206 on a LICOR scanner. \*\* p<0.001; \* p<0.01

1207 **c**, CROP recruitment to GUVs. GUVs  
 1208 containing the 5% of the indicated phosphoinositides and the fluorophore CY5.5-PE  
 1209 recombinant Atg18 (2.5 nM) covalently linked to dylight550 and CSC<sup>GFP</sup> (100 nM) as  
 1210 indicated. Samples were incubated for 30 min before acquisition on a confocal  
 1211 microscope. Scale bar: 20 μm.

1212

1213

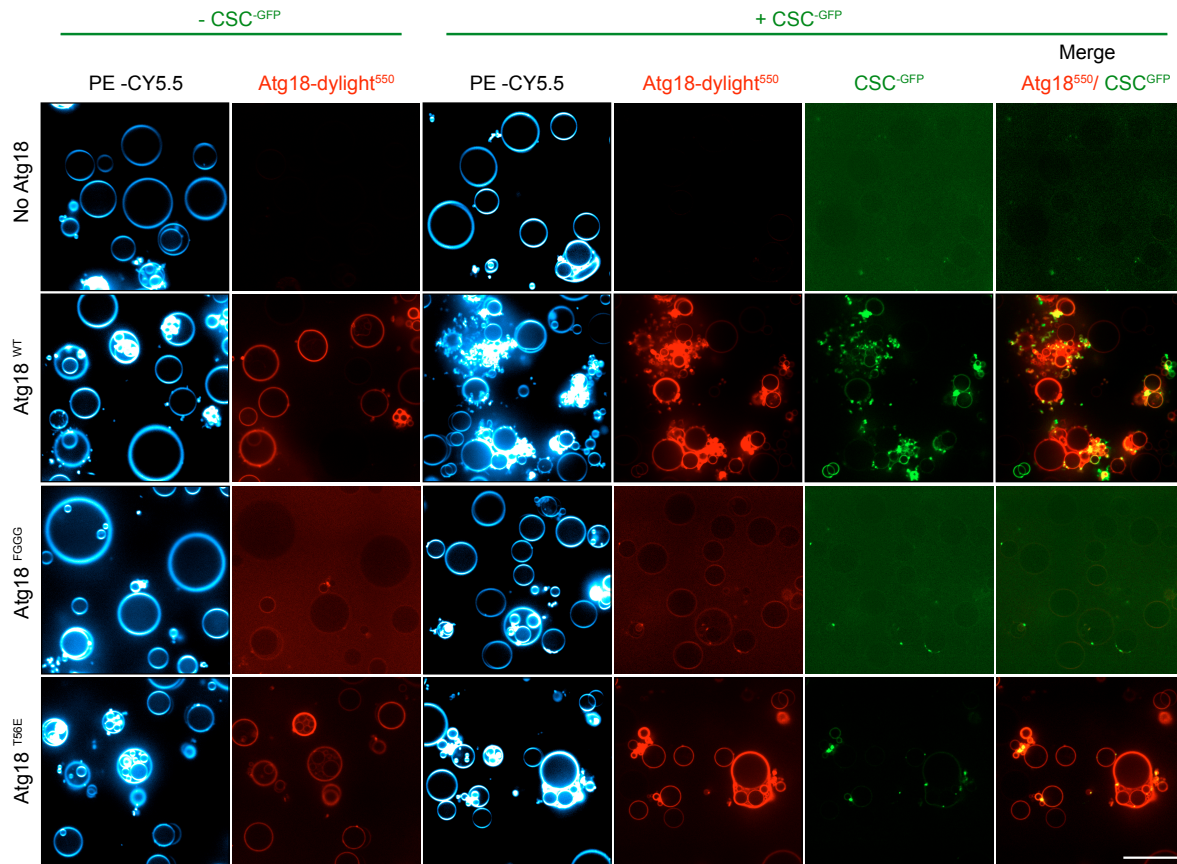

1214

1215 **Figure 8: Fission of giant unilamellar liposomes by CROP**

1216 GUVs containing 2.5% PI3P, 2.5% PI(3,5)P<sub>2</sub> and CY5.5-PE were incubated (30 min,  
1217 25°C) alone or with recombinant Atg18 variants (25 nM), which had been covalently  
1218 linked to a dylight550 fluorophore (red). CSC<sup>GFP</sup> (50 nM) was added to part of the  
1219 samples for 30 min, before the vesicles were imaged on a confocal microscope.

1220 Scale bar: 20 μm.

1221

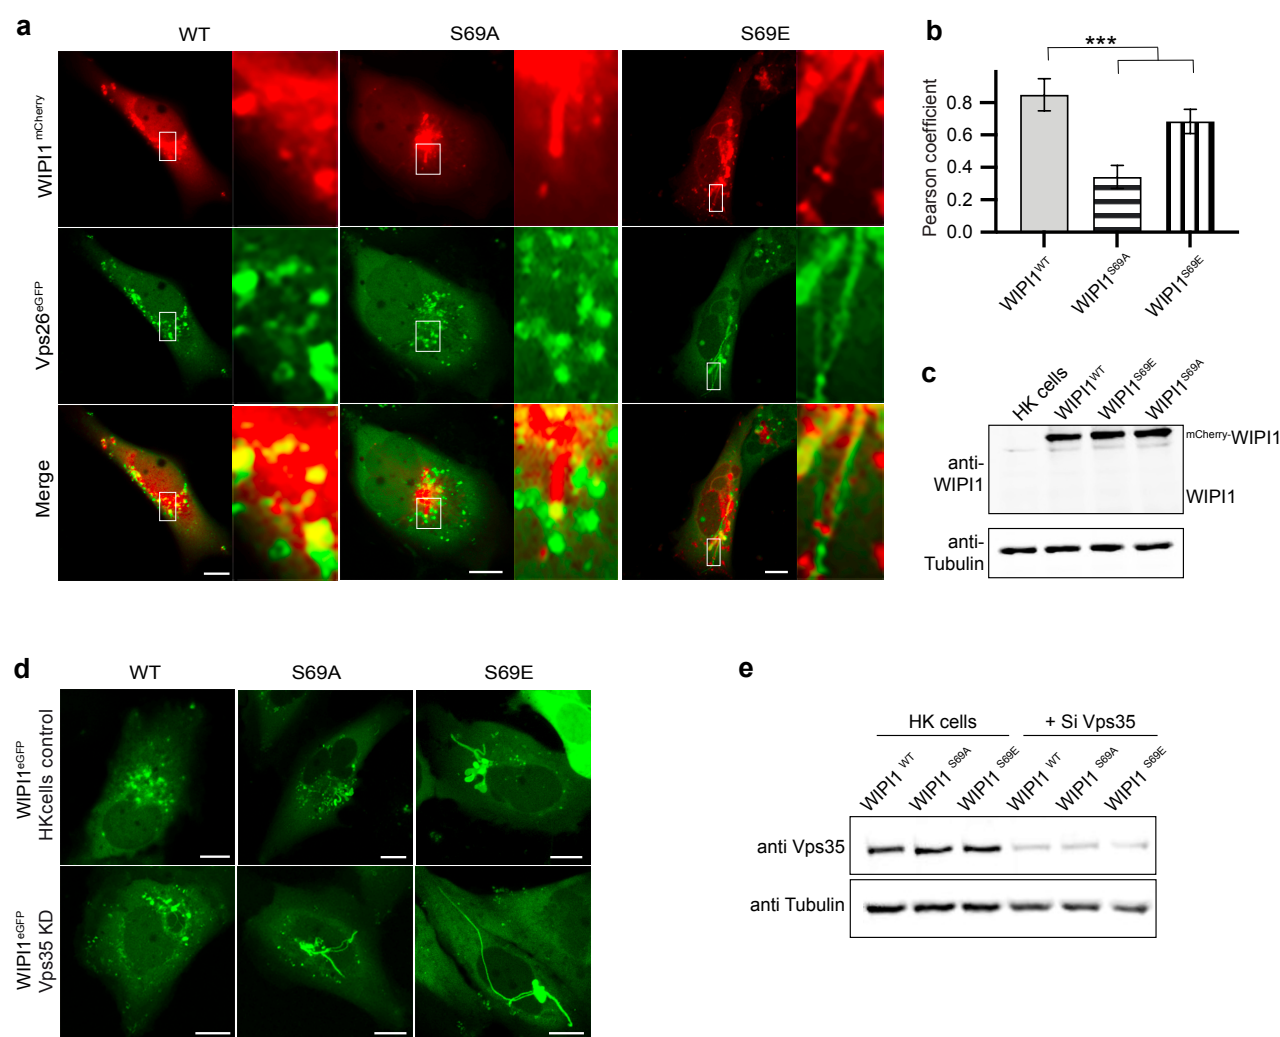

1222

1223 **Figure 9: Effect of retromer and WIP11 on human endosomes**

1224 **a**, Colocalization of WIP11 with Vps26A. The indicated WIP11<sup>mCherry</sup> variants and  
 1225 Vps26<sup>eGFP</sup> were expressed for 18 h in HK2 cells, from which endogenous WIP11 had  
 1226 been deleted (WIP11-KO). The cells were analyzed by confocal microscopy. Scale  
 1227 bars: 10  $\mu$ m. Insets show enlargements of the outlined areas. **b**, Quantification of the  
 1228 colocalization in **a**, using the Pearson coefficient. Mean values  $\pm$  SD are shown. n=3  
 1229 independent experiments with a total of 150 cells were quantified per condition. \*\*\*  
 1230 p<0.01 **c**, Expression levels of WIP11<sup>mCherry</sup> variants. Lysates (50  $\mu$ g of protein per  
 1231 sample) from the cells in **A** were analyzed by SDS-PAGE and Western blot against  
 1232 WIP11 and tubulin. **d**, Additive effect of WIP11<sup>S69A</sup> and deletion of Vps35. HK2 cells  
 1233 expressing the indicated WIP11<sup>eGFP</sup> variants were transfected with siRNA against  
 1234 Vps35 or a control siRNA pool. Confocal microscopy was performed 18 h after  
 1235 transfection. Scale bar: 10  $\mu$ m. **e**, Vps35 levels after knock-down. Lysates (50  $\mu$ g per

1236 sample) from the cells in d were analyzed by SDS-PAGE and Western blot against  
1237 Vps35 and tubulin.

1238

1239

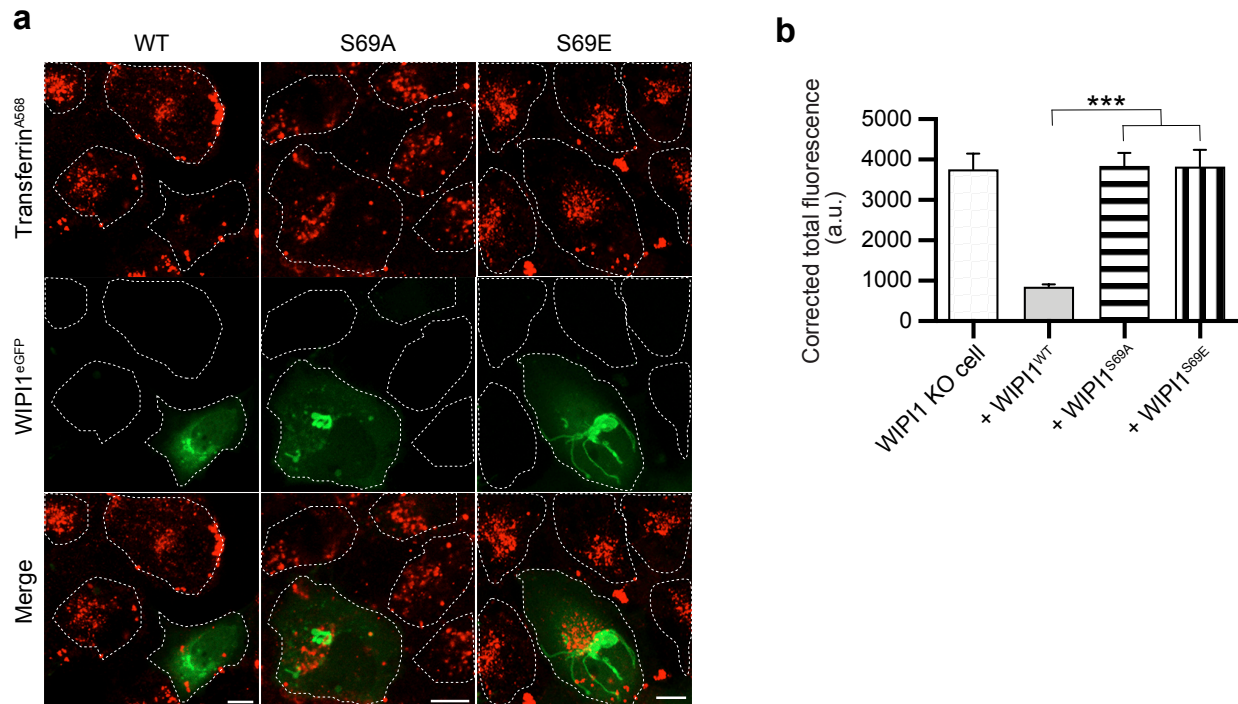

1240

1241 **Figure 10: Effect of CROP on protein exit from mammalian endosomes**

1242 **a**, Tf recycling. WIP11-KO cells were transfected with WIP11<sup>WT</sup>-eGFP, WIP11<sup>S69E</sup>-eGFP or  
1243 WIP11<sup>S69A</sup>-eGFP for 18h. Then, they were serum-starved for 1 h, loaded with Alexa  
1244 Fluor 568-conjugated Tf, chased at 37°C for 1 h without labeled Tf, and analyzed by  
1245 confocal microscopy. Scale bar: 10 μm. White dashed lines delineate the  
1246 circumference of the cells. **b**, Quantification of Tf-fluorescence in the cells from **a** that  
1247 expressed WIP11 variants. Total cell fluorescence was integrated and corrected for  
1248 background fluorescence. Mean values ± SD are shown. n=3 independent  
1249 experiments with a total of 150 cells analyzed per condition. \*\*\* p<0.001.

1250



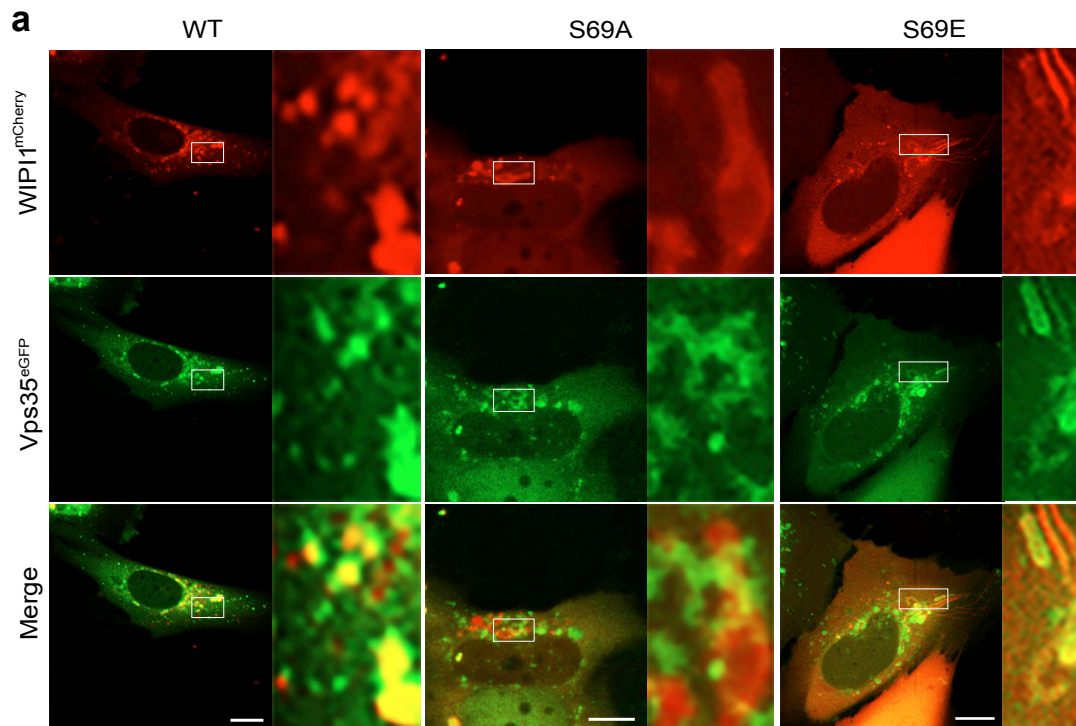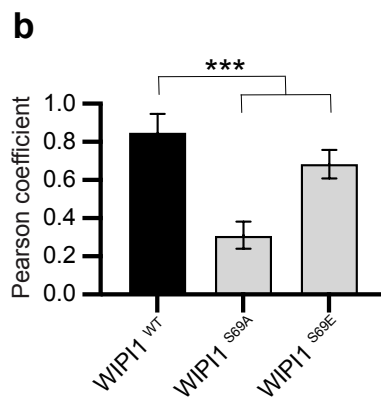

1251

1252 **Supplementary Figure 1: Colocalization of WIP1<sup>S69</sup> variants with hVps35**

1253 **a**, The indicated WIP1<sup>S69mCherry</sup> variants and Vps35<sup>eGFP</sup> were expressed for 18 h in  
1254 HK2 cells, from which endogenous WIP1 had been deleted. The cells were analyzed  
1255 by confocal microscopy. Scale bars: 10  $\mu$ m. Insets show enlargements of the outlined  
1256 areas. **b**, Quantification of the colocalization in **a**, using the Pearson coefficient. Mean  
1257 values  $\pm$  SD are shown. n=3 independent experiments with a total of 195 cells were  
1258 quantified per condition. \*\*\* p<0.001.

1259



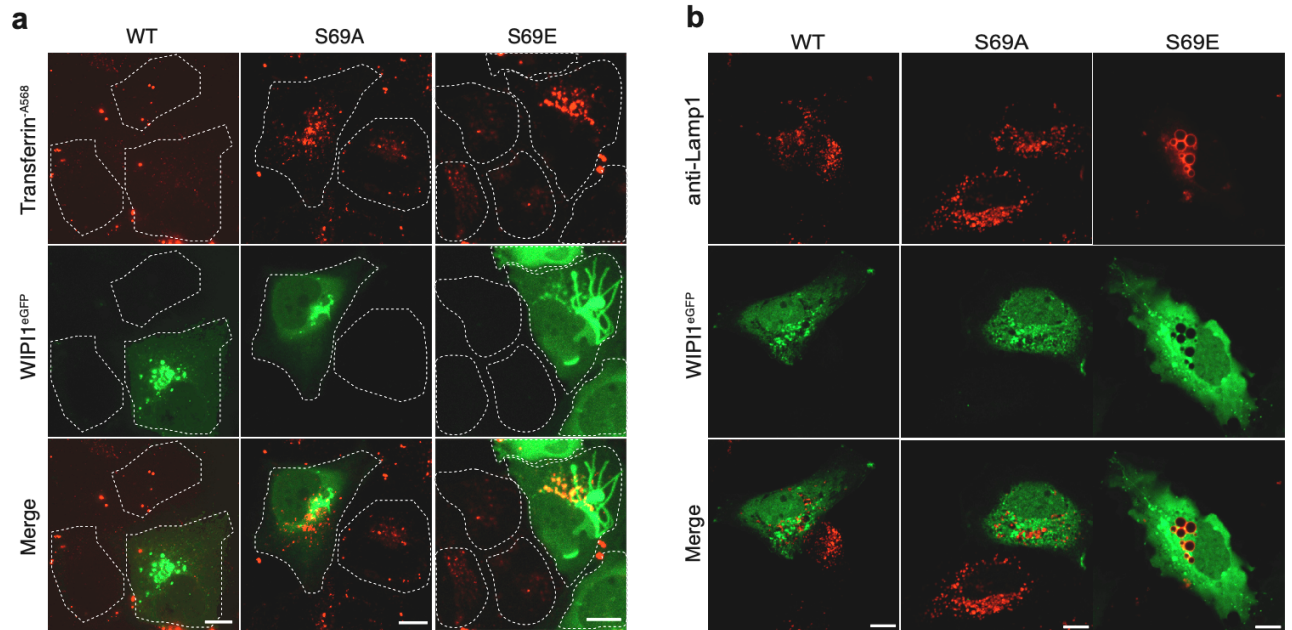

1260

1261 **Supplementary Figure 2: Dominant negative effect of EGFP-WIP1<sup>S69E</sup> on**  
1262 **Transferrin recycling and on LAMP1 compartments.**

1263 **a**, Tf recycling. HK2 cells were transfected with WIP1<sup>WT</sup>-EGFP, WIP1<sup>S69E</sup>-EGFP or  
1264 WIP1<sup>S69A</sup>-EGFP for 18 h. Then, they were serum-starved for 1h, loaded with Alexa  
1265 Fluor 568-conjugated Tf, chased at 37°C for 1 h in medium without labeled Tf, and  
1266 analyzed by confocal microscopy. Scale bar: 10  $\mu$ M. The white dashed lines indicate  
1267 the circumference of the cells. **b**, LAMP1 compartments. HK2 cells expressing  
1268 WIP1<sup>WT</sup>-eGFP, WIP1<sup>S69E</sup>-eGFP or WIP1<sup>S69A</sup>-eGFP were fixed 18 h after transfection. The  
1269 cells were stained for immunofluorescence analysis with anti-LAMP1 antibody and  
1270 imaged by confocal microscopy. Scale bars: 10  $\mu$ m.

1271

1272
